# Supplementary material for: Insertional Mutagenesis and Deep Profiling Reveals Gene Hierarchies and a Myc/p53-Dependent Bottleneck in Lymphomagenesis
Source: PLoS Genet. 2014 Feb 27;10(2):e1004167. doi: 10.1371/journal.pgen.1004167 (PMC3937229; doi:10.1371/journal.pgen.1004167)
Supplement: Table S2 — .bed file of all GIM1 alignments, showing chromosomal locations, tumour identity, read counts and strand polarity. (XLSX) [file pgen.1004167.s009.xlsx]

## Sheet: TableS2
track name="GIM1_alignments" description="GIM1_alignments" visibility=full itemRgb=on useScore=0
chr1	6252738	6252739	GiM-12i(1)	1	-	6252738	6252739	255,0,0
chr1	6446293	6446294	GiM-6i(3)	3	-	6446293	6446294	255,0,0
chr1	9872932	9872933	GiM-18i(8)	8	+	9872932	9872933	0,192,0
chr1	11084835	11084836	GiM-8i(1)	1	-	11084835	11084836	255,0,0
chr1	15841459	15841460	GiM-3i(10)	10	+	15841459	15841460	0,192,0
chr1	16166935	16166936	GiM-5i(1)	1	-	16166935	16166936	255,0,0
chr1	16286613	16286614	GiM-8i(2)	2	+	16286613	16286614	0,192,0
chr1	16522625	16522626	GiM-19i(4)	4	-	16522625	16522626	255,0,0
chr1	20811100	20811101	GiM-1i(1)	1	-	20811100	20811101	255,0,0
chr1	23840204	23840205	GiM-20i(1)	1	-	23840204	23840205	255,0,0
chr1	23840299	23840300	GiM-1i(3)	3	+	23840299	23840300	0,192,0
chr1	30929964	30929965	GiM-7i(2)	2	+	30929964	30929965	0,192,0
chr1	33639547	33639548	GiM-3i(1)	1	+	33639547	33639548	0,192,0
chr1	35699802	35699803	GiM-17i(1)	1	-	35699802	35699803	255,0,0
chr1	35702959	35702960	GiM-10i(1)	1	-	35702959	35702960	255,0,0
chr1	35711221	35711222	GiM-23i(18)	18	+	35711221	35711222	0,192,0
chr1	35712096	35712097	GiM-2i(3)	3	-	35712096	35712097	255,0,0
chr1	35874958	35874959	GiM-13i(3)	3	+	35874958	35874959	0,192,0
chr1	35992656	35992657	GiM-21i(5)	5	-	35992656	35992657	255,0,0
chr1	36082357	36082358	GiM-3i(13)	13	+	36082357	36082358	0,192,0
chr1	36117925	36117926	GiM-19i(1)	1	-	36117925	36117926	255,0,0
chr1	36187865	36187866	GiM-13i(1)	1	-	36187865	36187866	255,0,0
chr1	36319375	36319376	GiM-11i(5)	5	+	36319375	36319376	0,192,0
chr1	36321014	36321015	GiM-26i(1)	1	+	36321014	36321015	0,192,0
chr1	36345832	36345833	GiM-24i(1)	1	+	36345832	36345833	0,192,0
chr1	36350968	36350969	GiM-18i(3)	3	+	36350968	36350969	0,192,0
chr1	36353638	36353639	GiM-19i(1)	1	-	36353638	36353639	255,0,0
chr1	36357296	36357297	GiM-7i(1)	1	+	36357296	36357297	0,192,0
chr1	36458978	36458979	GiM-2i(2)	2	-	36458978	36458979	255,0,0
chr1	36626901	36626902	GiM-21i(11)	11	+	36626901	36626902	0,192,0
chr1	36647944	36647945	GiM-7i(3)	3	-	36647944	36647945	255,0,0
chr1	36651858	36651859	GiM-14i(1)	1	+	36651858	36651859	0,192,0
chr1	36660168	36660169	GiM-6i(5)	5	-	36660168	36660169	255,0,0
chr1	36660608	36660609	GiM-19i(3)	3	+	36660608	36660609	0,192,0
chr1	36662207	36662208	GiM-25i(2)	2	+	36662207	36662208	0,192,0
chr1	36819695	36819696	GiM-16i(1)	1	-	36819695	36819696	255,0,0
chr1	36820337	36820338	GiM-24i(4)	4	+	36820337	36820338	0,192,0
chr1	36823823	36823824	GiM-27i(3)	3	+	36823823	36823824	0,192,0
chr1	36971840	36971841	GiM-22i(7)	7	+	36971840	36971841	0,192,0
chr1	36980631	36980632	GiM-22i(2)	2	+	36980631	36980632	0,192,0
chr1	37071470	37071471	GiM-23i(1)	1	-	37071470	37071471	255,0,0
chr1	37531689	37531690	GiM-5i(2)	2	+	37531689	37531690	0,192,0
chr1	37534579	37534580	GiM-21i(2)	2	-	37534579	37534580	255,0,0
chr1	37535194	37535195	GiM-24i(1)	1	+	37535194	37535195	0,192,0
chr1	37536541	37536542	GiM-8i(1)	1	-	37536541	37536542	255,0,0
chr1	37537505	37537506	GiM-9i(2)	2	-	37537505	37537506	255,0,0
chr1	37672758	37672759	GiM-4i(6)	6	-	37672758	37672759	255,0,0
chr1	37673389	37673390	GiM-20i(4)	4	-	37673389	37673390	255,0,0
chr1	37750838	37750839	GiM-13i(14)	14	-	37750838	37750839	255,0,0
chr1	37751491	37751492	GiM-2i(1)	1	-	37751491	37751492	255,0,0
chr1	37752373	37752374	GiM-12i(1)	1	+	37752373	37752374	0,192,0
chr1	37752950	37752951	GiM-12i(7)	7	+	37752950	37752951	0,192,0
chr1	37753105	37753106	GiM-5i(1)	1	-	37753105	37753106	255,0,0
chr1	37753219	37753220	GiM-13i(1)	1	+	37753219	37753220	0,192,0
chr1	37754078	37754079	GiM-21i(2)	2	-	37754078	37754079	255,0,0
chr1	37930140	37930141	GiM-10i(9)	9	+	37930140	37930141	0,192,0
chr1	38183216	38183217	GiM-5i(2)	2	-	38183216	38183217	255,0,0
chr1	38408305	38408306	GiM-23i(2)	2	+	38408305	38408306	0,192,0
chr1	38615781	38615782	GiM-5i(1)	1	+	38615781	38615782	0,192,0
chr1	38942527	38942528	GiM-18i(2)	2	-	38942527	38942528	255,0,0
chr1	38946612	38946613	GiM-3i(6)	6	-	38946612	38946613	255,0,0
chr1	39044067	39044068	GiM-9i(1)	1	-	39044067	39044068	255,0,0
chr1	39103167	39103168	GiM-6i(1)	1	-	39103167	39103168	255,0,0
chr1	39261657	39261658	GiM-17i(1)	1	-	39261657	39261658	255,0,0
chr1	39401483	39401484	GiM-14i(9)	9	+	39401483	39401484	0,192,0
chr1	39402636	39402637	GiM-14i(3)	3	-	39402636	39402637	255,0,0
chr1	39615823	39615824	GiM-27i(1)	1	+	39615823	39615824	0,192,0
chr1	39616499	39616500	GiM-10i(1)	1	+	39616499	39616500	0,192,0
chr1	39792445	39792446	GiM-13i(2)	2	-	39792445	39792446	255,0,0
chr1	39806861	39806862	GiM-5i(3)	3	+	39806861	39806862	0,192,0
chr1	39818099	39818100	GiM-25i(6)	6	-	39818099	39818100	255,0,0
chr1	39988879	39988880	GiM-20i(4)	4	-	39988879	39988880	255,0,0
chr1	39990147	39990148	GiM-16i(3)	3	+	39990147	39990148	0,192,0
chr1	39991895	39991896	GiM-24i(1)	1	+	39991895	39991896	0,192,0
chr1	40327727	40327728	GiM-3i(2)	2	+	40327727	40327728	0,192,0
chr1	40380913	40380914	GiM-16i(2)	2	+	40380913	40380914	0,192,0
chr1	40534422	40534423	GiM-25i(1)	1	+	40534422	40534423	0,192,0
chr1	40534751	40534752	GiM-10i(1)	1	+	40534751	40534752	0,192,0
chr1	40535215	40535216	GiM-5i(2)	2	+	40535215	40535216	0,192,0
chr1	43507285	43507286	GiM-11i(3)	3	+	43507285	43507286	0,192,0
chr1	43513022	43513023	GiM-7i(1)	1	-	43513022	43513023	255,0,0
chr1	43524191	43524192	GiM-21i(2)	2	+	43524191	43524192	0,192,0
chr1	43571011	43571012	GiM-7i(1)	1	+	43571011	43571012	0,192,0
chr1	43595101	43595102	GiM-1i(4)	4	-	43595101	43595102	255,0,0
chr1	43595983	43595984	GiM-21i(1)	1	+	43595983	43595984	0,192,0
chr1	43597194	43597195	GiM-25i(4)	4	-	43597194	43597195	255,0,0
chr1	43600236	43600237	GiM-21i(1)	1	-	43600236	43600237	255,0,0
chr1	43600475	43600476	GiM-22i(3)	3	+	43600475	43600476	0,192,0
chr1	43601299	43601300	GiM-2i(1)	1	-	43601299	43601300	255,0,0
chr1	43611375	43611376	GiM-7i(1)	1	-	43611375	43611376	255,0,0
chr1	43619206	43619207	GiM-9i(1)	1	+	43619206	43619207	0,192,0
chr1	43659267	43659268	GiM-1i(1)	1	-	43659267	43659268	255,0,0
chr1	43660807	43660808	GiM-10i(4)	4	-	43660807	43660808	255,0,0
chr1	43662268	43662269	GiM-19i(2)	2	-	43662268	43662269	255,0,0
chr1	43662549	43662550	GiM-11i(1)	1	-	43662549	43662550	255,0,0
chr1	43662776	43662777	GiM-14i(1)	1	-	43662776	43662777	255,0,0
chr1	43662993	43662994	GiM-12i(3)	3	+	43662993	43662994	0,192,0
chr1	43691646	43691647	GiM-4i(1)	1	+	43691646	43691647	0,192,0
chr1	46911122	46911123	GiM-23i(2)	2	+	46911122	46911123	0,192,0
chr1	50082273	50082274	GiM-10i(4)	4	-	50082273	50082274	255,0,0
chr1	51639214	51639215	GiM-27i(5)	5	-	51639214	51639215	255,0,0
chr1	51639920	51639921	GiM-10i(1)	1	-	51639920	51639921	255,0,0
chr1	51640509	51640510	GiM-20i(1)	1	+	51640509	51640510	0,192,0
chr1	51640929	51640930	GiM-20i(1)	1	-	51640929	51640930	255,0,0
chr1	51641161	51641162	GiM-26i(5)	5	+	51641161	51641162	0,192,0
chr1	51641400	51641401	GiM-20i(2)	2	+	51641400	51641401	0,192,0
chr1	51641444	51641445	GiM-1i(6)	6	+	51641444	51641445	0,192,0
chr1	51643138	51643139	GiM-26i(1)	1	+	51643138	51643139	0,192,0
chr1	51644015	51644016	GiM-4i(5)	5	+	51644015	51644016	0,192,0
chr1	51651864	51651865	GiM-17i(4)	4	-	51651864	51651865	255,0,0
chr1	52068757	52068758	GiM-20i(2)	2	-	52068757	52068758	255,0,0
chr1	52288299	52288300	GiM-15i(3)	3	-	52288299	52288300	255,0,0
chr1	52556679	52556680	GiM-13i(1)	1	-	52556679	52556680	255,0,0
chr1	52636986	52636987	GiM-4i(2)	2	+	52636986	52636987	0,192,0
chr1	53831491	53831492	GiM-13i(4)	4	-	53831491	53831492	255,0,0
chr1	53833164	53833165	GiM-22i(4)	4	+	53833164	53833165	0,192,0
chr1	53839303	53839304	GiM-5i(1)	1	+	53839303	53839304	0,192,0
chr1	54174593	54174594	GiM-26i(4)	4	+	54174593	54174594	0,192,0
chr1	54478184	54478185	GiM-20i(2)	2	+	54478184	54478185	0,192,0
chr1	54478465	54478466	GiM-8i(1)	1	-	54478465	54478466	255,0,0
chr1	54479429	54479430	GiM-13i(1)	1	+	54479429	54479430	0,192,0
chr1	54962115	54962116	GiM-19i(1)	1	-	54962115	54962116	255,0,0
chr1	54962841	54962842	GiM-26i(1)	1	+	54962841	54962842	0,192,0
chr1	54967566	54967567	GiM-25i(4)	4	+	54967566	54967567	0,192,0
chr1	54968157	54968158	GiM-14i(4)	4	+	54968157	54968158	0,192,0
chr1	54969760	54969761	GiM-21i(1)	1	+	54969760	54969761	0,192,0
chr1	54969865	54969866	GiM-26i(1)	1	+	54969865	54969866	0,192,0
chr1	55088087	55088088	GiM-22i(1)	1	-	55088087	55088088	255,0,0
chr1	55455496	55455497	GiM-20i(1)	1	-	55455496	55455497	255,0,0
chr1	55493916	55493917	GiM-19i(2)	2	+	55493916	55493917	0,192,0
chr1	55495329	55495330	GiM-18i(1)	1	-	55495329	55495330	255,0,0
chr1	55502547	55502548	GiM-9i(2)	2	-	55502547	55502548	255,0,0
chr1	55505871	55505872	GiM-10i(1)	1	+	55505871	55505872	0,192,0
chr1	57958928	57958929	GiM-22i(5)	5	+	57958928	57958929	0,192,0
chr1	57961910	57961911	GiM-5i(2)	2	+	57961910	57961911	0,192,0
chr1	58480813	58480814	GiM-14i(3)	3	+	58480813	58480814	0,192,0
chr1	58768018	58768019	GiM-13i(1)	1	-	58768018	58768019	255,0,0
chr1	58772615	58772616	GiM-2i(10)	10	-	58772615	58772616	255,0,0
chr1	58772619	58772620	GiM-18i(1)	1	-	58772619	58772620	255,0,0
chr1	58778851	58778852	GiM-6i(1)	1	-	58778851	58778852	255,0,0
chr1	59206736	59206737	GiM-5i(76)	76	+	59206736	59206737	0,192,0
chr1	59206947	59206948	GiM-20i(7)	7	-	59206947	59206948	255,0,0
chr1	59208260	59208261	GiM-1i(1)	1	+	59208260	59208261	0,192,0
chr1	59218924	59218925	GiM-20i(2)	2	+	59218924	59218925	0,192,0
chr1	59219294	59219295	GiM-19i(69)	69	+	59219294	59219295	0,192,0
chr1	59227352	59227353	GiM-9i(4)	4	-	59227352	59227353	255,0,0
chr1	59228039	59228040	GiM-10i(1)	1	+	59228039	59228040	0,192,0
chr1	59228313	59228314	GiM-12i(1)	1	-	59228313	59228314	255,0,0
chr1	59229430	59229431	GiM-18i(1)	1	-	59229430	59229431	255,0,0
chr1	59229779	59229780	GiM-1i(1)	1	+	59229779	59229780	0,192,0
chr1	59230301	59230302	GiM-19i(1)	1	-	59230301	59230302	255,0,0
chr1	59230559	59230560	GiM-16i(2)	2	+	59230559	59230560	0,192,0
chr1	59230559	59230560	GiM-27i(4)	4	+	59230559	59230560	0,192,0
chr1	59231264	59231265	GiM-3i(7)	7	+	59231264	59231265	0,192,0
chr1	59232238	59232239	GiM-7i(2)	2	-	59232238	59232239	255,0,0
chr1	59235906	59235907	GiM-8i(2)	2	+	59235906	59235907	0,192,0
chr1	59236004	59236005	GiM-18i(6)	6	-	59236004	59236005	255,0,0
chr1	59237718	59237719	GiM-11i(1)	1	+	59237718	59237719	0,192,0
chr1	59237757	59237758	GiM-10i(1)	1	+	59237757	59237758	0,192,0
chr1	59658904	59658905	GiM-2i(2)	2	-	59658904	59658905	255,0,0
chr1	59665669	59665670	GiM-11i(1)	1	+	59665669	59665670	0,192,0
chr1	60130284	60130285	GiM-23i(1)	1	+	60130284	60130285	0,192,0
chr1	60130548	60130549	GiM-11i(2)	2	-	60130548	60130549	255,0,0
chr1	60131760	60131761	GiM-24i(2)	2	+	60131760	60131761	0,192,0
chr1	60132541	60132542	GiM-13i(4)	4	+	60132541	60132542	0,192,0
chr1	60133068	60133069	GiM-9i(1)	1	-	60133068	60133069	255,0,0
chr1	60133099	60133100	GiM-20i(2)	2	+	60133099	60133100	0,192,0
chr1	60292384	60292385	GiM-5i(3)	3	-	60292384	60292385	255,0,0
chr1	60292906	60292907	GiM-23i(2)	2	+	60292906	60292907	0,192,0
chr1	60293470	60293471	GiM-3i(9)	9	-	60293470	60293471	255,0,0
chr1	60780232	60780233	GiM-10i(1)	1	+	60780232	60780233	0,192,0
chr1	60802506	60802507	GiM-8i(1)	1	-	60802506	60802507	255,0,0
chr1	60815235	60815236	GiM-13i(4)	4	-	60815235	60815236	255,0,0
chr1	60815974	60815975	GiM-18i(3)	3	-	60815974	60815975	255,0,0
chr1	60832949	60832950	GiM-9i(1)	1	+	60832949	60832950	0,192,0
chr1	60833144	60833145	GiM-10i(1)	1	-	60833144	60833145	255,0,0
chr1	60834821	60834822	GiM-28i(1)	1	+	60834821	60834822	0,192,0
chr1	60836239	60836240	GiM-10i(1)	1	+	60836239	60836240	0,192,0
chr1	60836243	60836244	GiM-3i(1)	1	+	60836243	60836244	0,192,0
chr1	60836280	60836281	GiM-4i(11)	11	-	60836280	60836281	255,0,0
chr1	60967619	60967620	GiM-16i(2)	2	-	60967619	60967620	255,0,0
chr1	61027992	61027993	GiM-15i(3)	3	+	61027992	61027993	0,192,0
chr1	62872752	62872753	GiM-2i(4)	4	+	62872752	62872753	0,192,0
chr1	62923312	62923313	GiM-19i(5)	5	+	62923312	62923313	0,192,0
chr1	62923878	62923879	GiM-13i(2)	2	+	62923878	62923879	0,192,0
chr1	64136500	64136501	GiM-5i(2)	2	-	64136500	64136501	255,0,0
chr1	64137163	64137164	GiM-21i(5)	5	-	64137163	64137164	255,0,0
chr1	64343495	64343496	GiM-20i(14)	14	+	64343495	64343496	0,192,0
chr1	64555986	64555987	GiM-16i(1)	1	-	64555986	64555987	255,0,0
chr1	64573651	64573652	GiM-27i(1)	1	-	64573651	64573652	255,0,0
chr1	64573855	64573856	GiM-1i(1)	1	-	64573855	64573856	255,0,0
chr1	64577833	64577834	GiM-5i(2)	2	-	64577833	64577834	255,0,0
chr1	64577901	64577902	GiM-10i(1)	1	+	64577901	64577902	0,192,0
chr1	64701688	64701689	GiM-16i(5)	5	-	64701688	64701689	255,0,0
chr1	64701835	64701836	GiM-15i(1)	1	+	64701835	64701836	0,192,0
chr1	64919969	64919970	GiM-7i(1)	1	+	64919969	64919970	0,192,0
chr1	64996759	64996760	GiM-23i(1)	1	-	64996759	64996760	255,0,0
chr1	66862196	66862197	GiM-18i(3)	3	-	66862196	66862197	255,0,0
chr1	66868097	66868098	GiM-19i(5)	5	-	66868097	66868098	255,0,0
chr1	66885396	66885397	GiM-11i(1)	1	+	66885396	66885397	0,192,0
chr1	69560872	69560873	GiM-18i(1)	1	-	69560872	69560873	255,0,0
chr1	69732281	69732282	GiM-9i(4)	4	+	69732281	69732282	0,192,0
chr1	69814986	69814987	GiM-6i(2)	2	-	69814986	69814987	255,0,0
chr1	69815219	69815220	GiM-6i(2)	2	+	69815219	69815220	0,192,0
chr1	71148475	71148476	GiM-5i(1)	1	-	71148475	71148476	255,0,0
chr1	71153236	71153237	GiM-19i(1)	1	+	71153236	71153237	0,192,0
chr1	71608818	71608819	GiM-28i(1)	1	-	71608818	71608819	255,0,0
chr1	72630297	72630298	GiM-19i(4)	4	-	72630297	72630298	255,0,0
chr1	72630297	72630298	GiM-3i(14)	14	-	72630297	72630298	255,0,0
chr1	72754617	72754618	GiM-1i(2)	2	-	72754617	72754618	255,0,0
chr1	74363834	74363835	GiM-10i(4)	4	+	74363834	74363835	0,192,0
chr1	74378374	74378375	GiM-13i(1)	1	-	74378374	74378375	255,0,0
chr1	74442584	74442585	GiM-17i(2)	2	+	74442584	74442585	0,192,0
chr1	74553459	74553460	GiM-9i(1)	1	-	74553459	74553460	255,0,0
chr1	74856446	74856447	GiM-2i(1)	1	+	74856446	74856447	0,192,0
chr1	79758606	79758607	GiM-7i(2)	2	+	79758606	79758607	0,192,0
chr1	80338872	80338873	GiM-27i(1)	1	+	80338872	80338873	0,192,0
chr1	80409494	80409495	GiM-6i(2)	2	-	80409494	80409495	255,0,0
chr1	82312628	82312629	GiM-17i(10)	10	+	82312628	82312629	0,192,0
chr1	82828586	82828587	GiM-4i(1)	1	-	82828586	82828587	255,0,0
chr1	84423885	84423886	GiM-21i(2)	2	-	84423885	84423886	255,0,0
chr1	87493973	87493974	GiM-11i(1)	1	+	87493973	87493974	0,192,0
chr1	87582656	87582657	GiM-26i(2)	2	-	87582656	87582657	255,0,0
chr1	87595513	87595514	GiM-18i(2)	2	+	87595513	87595514	0,192,0
chr1	87648786	87648787	GiM-11i(2)	2	+	87648786	87648787	0,192,0
chr1	87648880	87648881	GiM-8i(1)	1	-	87648880	87648881	255,0,0
chr1	87648974	87648975	GiM-21i(2)	2	+	87648974	87648975	0,192,0
chr1	87845115	87845116	GiM-26i(1)	1	-	87845115	87845116	255,0,0
chr1	87847974	87847975	GiM-5i(1)	1	-	87847974	87847975	255,0,0
chr1	87848807	87848808	GiM-10i(1)	1	-	87848807	87848808	255,0,0
chr1	87853957	87853958	GiM-21i(1)	1	+	87853957	87853958	0,192,0
chr1	87881794	87881795	GiM-18i(1)	1	-	87881794	87881795	255,0,0
chr1	88197743	88197744	GiM-17i(2)	2	+	88197743	88197744	0,192,0
chr1	88257162	88257163	GiM-11i(3)	3	+	88257162	88257163	0,192,0
chr1	88320300	88320301	GiM-20i(3)	3	-	88320300	88320301	255,0,0
chr1	88337785	88337786	GiM-7i(1)	1	-	88337785	88337786	255,0,0
chr1	88338819	88338820	GiM-1i(1)	1	-	88338819	88338820	255,0,0
chr1	88378215	88378216	GiM-2i(2)	2	+	88378215	88378216	0,192,0
chr1	88399218	88399219	GiM-2i(1)	1	+	88399218	88399219	0,192,0
chr1	88399371	88399372	GiM-19i(1)	1	-	88399371	88399372	255,0,0
chr1	88399488	88399489	GiM-18i(1)	1	+	88399488	88399489	0,192,0
chr1	88399777	88399778	GiM-15i(1)	1	+	88399777	88399778	0,192,0
chr1	88399903	88399904	GiM-16i(3)	3	-	88399903	88399904	255,0,0
chr1	88401188	88401189	GiM-12i(2)	2	+	88401188	88401189	0,192,0
chr1	88401362	88401363	GiM-13i(3)	3	-	88401362	88401363	255,0,0
chr1	88401362	88401363	GiM-24i(1)	1	-	88401362	88401363	255,0,0
chr1	88401654	88401655	GiM-25i(1)	1	+	88401654	88401655	0,192,0
chr1	88405372	88405373	GiM-12i(1)	1	+	88405372	88405373	0,192,0
chr1	88420037	88420038	GiM-21i(1)	1	+	88420037	88420038	0,192,0
chr1	88420795	88420796	GiM-9i(2)	2	+	88420795	88420796	0,192,0
chr1	88422723	88422724	GiM-27i(1)	1	-	88422723	88422724	255,0,0
chr1	89553210	89553211	GiM-7i(1)	1	-	89553210	89553211	255,0,0
chr1	89554660	89554661	GiM-9i(2)	2	-	89554660	89554661	255,0,0
chr1	89723584	89723585	GiM-7i(1)	1	-	89723584	89723585	255,0,0
chr1	89725819	89725820	GiM-19i(1)	1	-	89725819	89725820	255,0,0
chr1	89743138	89743139	GiM-11i(1)	1	-	89743138	89743139	255,0,0
chr1	89743337	89743338	GiM-2i(6)	6	+	89743337	89743338	0,192,0
chr1	89744160	89744161	GiM-27i(1)	1	-	89744160	89744161	255,0,0
chr1	89797383	89797384	GiM-8i(1)	1	-	89797383	89797384	255,0,0
chr1	90551396	90551397	GiM-3i(2)	2	+	90551396	90551397	0,192,0
chr1	90578604	90578605	GiM-10i(1)	1	+	90578604	90578605	0,192,0
chr1	90581244	90581245	GiM-22i(3)	3	-	90581244	90581245	255,0,0
chr1	90987890	90987891	GiM-6i(1)	1	+	90987890	90987891	0,192,0
chr1	92590077	92590078	GiM-6i(5)	5	-	92590077	92590078	255,0,0
chr1	92593460	92593461	GiM-17i(6)	6	+	92593460	92593461	0,192,0
chr1	92593680	92593681	GiM-8i(2)	2	+	92593680	92593681	0,192,0
chr1	92950218	92950219	GiM-3i(4)	4	-	92950218	92950219	255,0,0
chr1	93077406	93077407	GiM-25i(2)	2	-	93077406	93077407	255,0,0
chr1	93077543	93077544	GiM-24i(1)	1	+	93077543	93077544	0,192,0
chr1	93080223	93080224	GiM-20i(10)	10	-	93080223	93080224	255,0,0
chr1	93081219	93081220	GiM-8i(1)	1	-	93081219	93081220	255,0,0
chr1	93089101	93089102	GiM-15i(9)	9	-	93089101	93089102	255,0,0
chr1	93089419	93089420	GiM-5i(2)	2	-	93089419	93089420	255,0,0
chr1	93089653	93089654	GiM-11i(1)	1	+	93089653	93089654	0,192,0
chr1	93090529	93090530	GiM-13i(2)	2	-	93090529	93090530	255,0,0
chr1	93137755	93137756	GiM-13i(4)	4	+	93137755	93137756	0,192,0
chr1	93198510	93198511	GiM-8i(2)	2	+	93198510	93198511	0,192,0
chr1	93208604	93208605	GiM-22i(4)	4	+	93208604	93208605	0,192,0
chr1	93210610	93210611	GiM-23i(4)	4	+	93210610	93210611	0,192,0
chr1	93306109	93306110	GiM-11i(4)	4	-	93306109	93306110	255,0,0
chr1	93497481	93497482	GiM-21i(2)	2	+	93497481	93497482	0,192,0
chr1	93498436	93498437	GiM-9i(1)	1	+	93498436	93498437	0,192,0
chr1	93522262	93522263	GiM-21i(2)	2	+	93522262	93522263	0,192,0
chr1	93522430	93522431	GiM-19i(1)	1	-	93522430	93522431	255,0,0
chr1	93522552	93522553	GiM-17i(3)	3	+	93522552	93522553	0,192,0
chr1	93523277	93523278	GiM-4i(1)	1	-	93523277	93523278	255,0,0
chr1	93523703	93523704	GiM-23i(2)	2	+	93523703	93523704	0,192,0
chr1	93523911	93523912	GiM-7i(2)	2	-	93523911	93523912	255,0,0
chr1	93523963	93523964	GiM-5i(1)	1	-	93523963	93523964	255,0,0
chr1	93525774	93525775	GiM-1i(3)	3	+	93525774	93525775	0,192,0
chr1	93557661	93557662	GiM-6i(2)	2	-	93557661	93557662	255,0,0
chr1	93961790	93961791	GiM-13i(1)	1	-	93961790	93961791	255,0,0
chr1	94068006	94068007	GiM-3i(60)	60	-	94068006	94068007	255,0,0
chr1	94068056	94068057	GiM-7i(3)	3	-	94068056	94068057	255,0,0
chr1	94070493	94070494	GiM-10i(37)	37	+	94070493	94070494	0,192,0
chr1	94071081	94071082	GiM-16i(2)	2	+	94071081	94071082	0,192,0
chr1	94079227	94079228	GiM-8i(2)	2	-	94079227	94079228	255,0,0
chr1	94795768	94795769	GiM-9i(1)	1	+	94795768	94795769	0,192,0
chr1	94805327	94805328	GiM-21i(2)	2	+	94805327	94805328	0,192,0
chr1	95015183	95015184	GiM-7i(1)	1	-	95015183	95015184	255,0,0
chr1	95698798	95698799	GiM-18i(6)	6	-	95698798	95698799	255,0,0
chr1	95930820	95930821	GiM-12i(1)	1	-	95930820	95930821	255,0,0
chr1	95933039	95933040	GiM-21i(7)	7	+	95933039	95933040	0,192,0
chr1	95933833	95933834	GiM-10i(1)	1	+	95933833	95933834	0,192,0
chr1	96607875	96607876	GiM-22i(2)	2	+	96607875	96607876	0,192,0
chr1	96688962	96688963	GiM-11i(1)	1	+	96688962	96688963	0,192,0
chr1	97164402	97164403	GiM-21i(3)	3	+	97164402	97164403	0,192,0
chr1	100027318	100027319	GiM-9i(1)	1	+	100027318	100027319	0,192,0
chr1	108214445	108214446	GiM-27i(5)	5	+	108214445	108214446	0,192,0
chr1	108411957	108411958	GiM-21i(1)	1	-	108411957	108411958	255,0,0
chr1	108411974	108411975	GiM-19i(1)	1	-	108411974	108411975	255,0,0
chr1	108497448	108497449	GiM-4i(1)	1	+	108497448	108497449	0,192,0
chr1	108764077	108764078	GiM-23i(1)	1	+	108764077	108764078	0,192,0
chr1	109431280	109431281	GiM-18i(9)	9	+	109431280	109431281	0,192,0
chr1	116652368	116652369	GiM-24i(1)	1	+	116652368	116652369	0,192,0
chr1	120214854	120214855	GiM-7i(7)	7	+	120214854	120214855	0,192,0
chr1	120218617	120218618	GiM-28i(1)	1	-	120218617	120218618	255,0,0
chr1	121170241	121170242	GiM-13i(4)	4	+	121170241	121170242	0,192,0
chr1	121182270	121182271	GiM-14i(3)	3	-	121182270	121182271	255,0,0
chr1	121183668	121183669	GiM-27i(2)	2	+	121183668	121183669	0,192,0
chr1	121184406	121184407	GiM-14i(4)	4	+	121184406	121184407	0,192,0
chr1	121185330	121185331	GiM-8i(1)	1	-	121185330	121185331	255,0,0
chr1	121185918	121185919	GiM-14i(4)	4	+	121185918	121185919	0,192,0
chr1	121186148	121186149	GiM-6i(2)	2	+	121186148	121186149	0,192,0
chr1	121186366	121186367	GiM-8i(1)	1	+	121186366	121186367	0,192,0
chr1	121187036	121187037	GiM-26i(2)	2	-	121187036	121187037	255,0,0
chr1	121188102	121188103	GiM-10i(3)	3	-	121188102	121188103	255,0,0
chr1	121317074	121317075	GiM-21i(1)	1	-	121317074	121317075	255,0,0
chr1	122161698	122161699	GiM-10i(3)	3	-	122161698	122161699	255,0,0
chr1	122857345	122857346	GiM-27i(2)	2	-	122857345	122857346	255,0,0
chr1	123365576	123365577	GiM-21i(1)	1	+	123365576	123365577	0,192,0
chr1	123514741	123514742	GiM-4i(4)	4	+	123514741	123514742	0,192,0
chr1	123515225	123515226	GiM-24i(1)	1	+	123515225	123515226	0,192,0
chr1	126376012	126376013	GiM-8i(1)	1	+	126376012	126376013	0,192,0
chr1	127626582	127626583	GiM-20i(2)	2	-	127626582	127626583	255,0,0
chr1	127724762	127724763	GiM-7i(1)	1	+	127724762	127724763	0,192,0
chr1	127996307	127996308	GiM-28i(1)	1	-	127996307	127996308	255,0,0
chr1	127999041	127999042	GiM-27i(1)	1	+	127999041	127999042	0,192,0
chr1	128006326	128006327	GiM-21i(1)	1	+	128006326	128006327	0,192,0
chr1	128064189	128064190	GiM-6i(3)	3	+	128064189	128064190	0,192,0
chr1	129103488	129103489	GiM-21i(3)	3	-	129103488	129103489	255,0,0
chr1	129107944	129107945	GiM-6i(7)	7	-	129107944	129107945	255,0,0
chr1	129110945	129110946	GiM-28i(1)	1	-	129110945	129110946	255,0,0
chr1	129122497	129122498	GiM-15i(2)	2	-	129122497	129122498	255,0,0
chr1	129193021	129193022	GiM-24i(1)	1	+	129193021	129193022	0,192,0
chr1	129200066	129200067	GiM-12i(10)	10	-	129200066	129200067	255,0,0
chr1	129207772	129207773	GiM-3i(2)	2	-	129207772	129207773	255,0,0
chr1	129725725	129725726	GiM-14i(3)	3	-	129725725	129725726	255,0,0
chr1	129955850	129955851	GiM-21i(1)	1	-	129955850	129955851	255,0,0
chr1	130256867	130256868	GiM-8i(1)	1	-	130256867	130256868	255,0,0
chr1	130498925	130498926	GiM-11i(2)	2	-	130498925	130498926	255,0,0
chr1	130498925	130498926	GiM-5i(1)	1	-	130498925	130498926	255,0,0
chr1	130678833	130678834	GiM-11i(1)	1	+	130678833	130678834	0,192,0
chr1	130687486	130687487	GiM-4i(2)	2	-	130687486	130687487	255,0,0
chr1	131439174	131439175	GiM-16i(1)	1	-	131439174	131439175	255,0,0
chr1	132344972	132344973	GiM-3i(1)	1	-	132344972	132344973	255,0,0
chr1	132694889	132694890	GiM-27i(11)	11	-	132694889	132694890	255,0,0
chr1	132695231	132695232	GiM-9i(2)	2	-	132695231	132695232	255,0,0
chr1	132761421	132761422	GiM-12i(2)	2	+	132761421	132761422	0,192,0
chr1	133035484	133035485	GiM-24i(1)	1	-	133035484	133035485	255,0,0
chr1	133096068	133096069	GiM-15i(1)	1	+	133096068	133096069	0,192,0
chr1	133099583	133099584	GiM-5i(2)	2	-	133099583	133099584	255,0,0
chr1	133176314	133176315	GiM-25i(1)	1	+	133176314	133176315	0,192,0
chr1	133323299	133323300	GiM-10i(1)	1	-	133323299	133323300	255,0,0
chr1	133533756	133533757	GiM-11i(2)	2	-	133533756	133533757	255,0,0
chr1	133651319	133651320	GiM-19i(1)	1	-	133651319	133651320	255,0,0
chr1	135072044	135072045	GiM-17i(3)	3	-	135072044	135072045	255,0,0
chr1	135086899	135086900	GiM-18i(46)	46	+	135086899	135086900	0,192,0
chr1	135087888	135087889	GiM-18i(3)	3	-	135087888	135087889	255,0,0
chr1	135134885	135134886	GiM-1i(2)	2	+	135134885	135134886	0,192,0
chr1	135441051	135441052	GiM-4i(4)	4	-	135441051	135441052	255,0,0
chr1	135442258	135442259	GiM-2i(3)	3	+	135442258	135442259	0,192,0
chr1	135445572	135445573	GiM-18i(1)	1	+	135445572	135445573	0,192,0
chr1	135607345	135607346	GiM-22i(1)	1	+	135607345	135607346	0,192,0
chr1	135958182	135958183	GiM-20i(2)	2	-	135958182	135958183	255,0,0
chr1	135958268	135958269	GiM-14i(1)	1	-	135958268	135958269	255,0,0
chr1	135958518	135958519	GiM-2i(1)	1	+	135958518	135958519	0,192,0
chr1	135958607	135958608	GiM-11i(10)	10	-	135958607	135958608	255,0,0
chr1	135959293	135959294	GiM-11i(3)	3	+	135959293	135959294	0,192,0
chr1	135959293	135959294	GiM-7i(2)	2	+	135959293	135959294	0,192,0
chr1	135960727	135960728	GiM-16i(5)	5	+	135960727	135960728	0,192,0
chr1	135961376	135961377	GiM-21i(3)	3	-	135961376	135961377	255,0,0
chr1	135961932	135961933	GiM-17i(1)	1	-	135961932	135961933	255,0,0
chr1	135962008	135962009	GiM-5i(1)	1	+	135962008	135962009	0,192,0
chr1	135963307	135963308	GiM-26i(8)	8	-	135963307	135963308	255,0,0
chr1	135964690	135964691	GiM-6i(1)	1	-	135964690	135964691	255,0,0
chr1	135967136	135967137	GiM-28i(1)	1	-	135967136	135967137	255,0,0
chr1	135973405	135973406	GiM-28i(2)	2	+	135973405	135973406	0,192,0
chr1	135975331	135975332	GiM-19i(1)	1	-	135975331	135975332	255,0,0
chr1	136199131	136199132	GiM-19i(1)	1	+	136199131	136199132	0,192,0
chr1	136259283	136259284	GiM-10i(1)	1	-	136259283	136259284	255,0,0
chr1	136309144	136309145	GiM-7i(1)	1	-	136309144	136309145	255,0,0
chr1	136412748	136412749	GiM-18i(5)	5	-	136412748	136412749	255,0,0
chr1	136414282	136414283	GiM-28i(7)	7	-	136414282	136414283	255,0,0
chr1	136827264	136827265	GiM-23i(1)	1	-	136827264	136827265	255,0,0
chr1	136932641	136932642	GiM-22i(1)	1	-	136932641	136932642	255,0,0
chr1	136960070	136960071	GiM-9i(1)	1	+	136960070	136960071	0,192,0
chr1	136983381	136983382	GiM-5i(3)	3	-	136983381	136983382	255,0,0
chr1	136983383	136983384	GiM-21i(1)	1	-	136983383	136983384	255,0,0
chr1	136984469	136984470	GiM-11i(3)	3	+	136984469	136984470	0,192,0
chr1	136987450	136987451	GiM-10i(2)	2	+	136987450	136987451	0,192,0
chr1	136991880	136991881	GiM-10i(3)	3	-	136991880	136991881	255,0,0
chr1	137025311	137025312	GiM-14i(1)	1	+	137025311	137025312	0,192,0
chr1	137025466	137025467	GiM-14i(1)	1	-	137025466	137025467	255,0,0
chr1	137029728	137029729	GiM-20i(2)	2	+	137029728	137029729	0,192,0
chr1	137032022	137032023	GiM-5i(2)	2	+	137032022	137032023	0,192,0
chr1	137407236	137407237	GiM-7i(2)	2	+	137407236	137407237	0,192,0
chr1	137554980	137554981	GiM-21i(2)	2	+	137554980	137554981	0,192,0
chr1	138024095	138024096	GiM-2i(1)	1	+	138024095	138024096	0,192,0
chr1	138024340	138024341	GiM-26i(10)	10	-	138024340	138024341	255,0,0
chr1	138028941	138028942	GiM-2i(1)	1	-	138028941	138028942	255,0,0
chr1	138030970	138030971	GiM-27i(1)	1	+	138030970	138030971	0,192,0
chr1	138031089	138031090	GiM-13i(7)	7	-	138031089	138031090	255,0,0
chr1	138032257	138032258	GiM-13i(10)	10	+	138032257	138032258	0,192,0
chr1	138035078	138035079	GiM-23i(1)	1	-	138035078	138035079	255,0,0
chr1	138125313	138125314	GiM-23i(1)	1	+	138125313	138125314	0,192,0
chr1	138146287	138146288	GiM-23i(4)	4	-	138146287	138146288	255,0,0
chr1	138149165	138149166	GiM-27i(2)	2	+	138149165	138149166	0,192,0
chr1	138149176	138149177	GiM-13i(4)	4	+	138149176	138149177	0,192,0
chr1	138149242	138149243	GiM-9i(2)	2	-	138149242	138149243	255,0,0
chr1	138149327	138149328	GiM-24i(2)	2	+	138149327	138149328	0,192,0
chr1	138149355	138149356	GiM-10i(3)	3	+	138149355	138149356	0,192,0
chr1	138149723	138149724	GiM-7i(3)	3	+	138149723	138149724	0,192,0
chr1	138149940	138149941	GiM-14i(1)	1	-	138149940	138149941	255,0,0
chr1	138150617	138150618	GiM-24i(2)	2	-	138150617	138150618	255,0,0
chr1	138151096	138151097	GiM-5i(2)	2	-	138151096	138151097	255,0,0
chr1	138152494	138152495	GiM-20i(1)	1	-	138152494	138152495	255,0,0
chr1	138156047	138156048	GiM-28i(3)	3	-	138156047	138156048	255,0,0
chr1	138162475	138162476	GiM-25i(1)	1	+	138162475	138162476	0,192,0
chr1	138213942	138213943	GiM-6i(1)	1	-	138213942	138213943	255,0,0
chr1	138415405	138415406	GiM-18i(6)	6	+	138415405	138415406	0,192,0
chr1	138581715	138581716	GiM-13i(1)	1	+	138581715	138581716	0,192,0
chr1	138581962	138581963	GiM-21i(1)	1	+	138581962	138581963	0,192,0
chr1	138582537	138582538	GiM-2i(2)	2	+	138582537	138582538	0,192,0
chr1	139605496	139605497	GiM-9i(1)	1	+	139605496	139605497	0,192,0
chr1	139671150	139671151	GiM-17i(2)	2	+	139671150	139671151	0,192,0
chr1	139672633	139672634	GiM-1i(2)	2	+	139672633	139672634	0,192,0
chr1	139672777	139672778	GiM-9i(1)	1	+	139672777	139672778	0,192,0
chr1	139702670	139702671	GiM-27i(1)	1	+	139702670	139702671	0,192,0
chr1	139702965	139702966	GiM-13i(1)	1	+	139702965	139702966	0,192,0
chr1	139703305	139703306	GiM-4i(3)	3	+	139703305	139703306	0,192,0
chr1	139703889	139703890	GiM-2i(2)	2	-	139703889	139703890	255,0,0
chr1	139704552	139704553	GiM-19i(3)	3	+	139704552	139704553	0,192,0
chr1	139708711	139708712	GiM-7i(3)	3	+	139708711	139708712	0,192,0
chr1	139709760	139709761	GiM-6i(3)	3	-	139709760	139709761	255,0,0
chr1	139710187	139710188	GiM-26i(4)	4	+	139710187	139710188	0,192,0
chr1	139894403	139894404	GiM-10i(2)	2	-	139894403	139894404	255,0,0
chr1	140028280	140028281	GiM-11i(4)	4	+	140028280	140028281	0,192,0
chr1	140029433	140029434	GiM-2i(1)	1	-	140029433	140029434	255,0,0
chr1	140044754	140044755	GiM-9i(1)	1	-	140044754	140044755	255,0,0
chr1	140045098	140045099	GiM-25i(2)	2	+	140045098	140045099	0,192,0
chr1	140045877	140045878	GiM-22i(1)	1	-	140045877	140045878	255,0,0
chr1	140053239	140053240	GiM-9i(2)	2	-	140053239	140053240	255,0,0
chr1	140065041	140065042	GiM-27i(1)	1	+	140065041	140065042	0,192,0
chr1	140066486	140066487	GiM-20i(3)	3	+	140066486	140066487	0,192,0
chr1	140067360	140067361	GiM-9i(1)	1	+	140067360	140067361	0,192,0
chr1	140070890	140070891	GiM-13i(1)	1	+	140070890	140070891	0,192,0
chr1	140071346	140071347	GiM-13i(1)	1	+	140071346	140071347	0,192,0
chr1	140071557	140071558	GiM-21i(1)	1	+	140071557	140071558	0,192,0
chr1	140072915	140072916	GiM-12i(1)	1	+	140072915	140072916	0,192,0
chr1	140076188	140076189	GiM-8i(1)	1	+	140076188	140076189	0,192,0
chr1	140089243	140089244	GiM-19i(3)	3	+	140089243	140089244	0,192,0
chr1	140089506	140089507	GiM-9i(1)	1	-	140089506	140089507	255,0,0
chr1	140098495	140098496	GiM-8i(1)	1	-	140098495	140098496	255,0,0
chr1	140148430	140148431	GiM-24i(1)	1	-	140148430	140148431	255,0,0
chr1	140195734	140195735	GiM-22i(2)	2	+	140195734	140195735	0,192,0
chr1	140197212	140197213	GiM-5i(1)	1	-	140197212	140197213	255,0,0
chr1	140210052	140210053	GiM-11i(1)	1	+	140210052	140210053	0,192,0
chr1	145765025	145765026	GiM-27i(1)	1	-	145765025	145765026	255,0,0
chr1	146032252	146032253	GiM-27i(1)	1	+	146032252	146032253	0,192,0
chr1	146154520	146154521	GiM-16i(4)	4	+	146154520	146154521	0,192,0
chr1	151788753	151788754	GiM-21i(3)	3	+	151788753	151788754	0,192,0
chr1	151790821	151790822	GiM-27i(4)	4	+	151790821	151790822	0,192,0
chr1	152050468	152050469	GiM-19i(1)	1	-	152050468	152050469	255,0,0
chr1	153097668	153097669	GiM-22i(3)	3	-	153097668	153097669	255,0,0
chr1	153117917	153117918	GiM-7i(1)	1	+	153117917	153117918	0,192,0
chr1	153190806	153190807	GiM-2i(2)	2	-	153190806	153190807	255,0,0
chr1	154440076	154440077	GiM-24i(1)	1	+	154440076	154440077	0,192,0
chr1	154442304	154442305	GiM-14i(2)	2	+	154442304	154442305	0,192,0
chr1	155355040	155355041	GiM-15i(1)	1	-	155355040	155355041	255,0,0
chr1	155691500	155691501	GiM-23i(2)	2	-	155691500	155691501	255,0,0
chr1	155694385	155694386	GiM-15i(1)	1	-	155694385	155694386	255,0,0
chr1	155694950	155694951	GiM-16i(1)	1	+	155694950	155694951	0,192,0
chr1	155783629	155783630	GiM-14i(3)	3	+	155783629	155783630	0,192,0
chr1	155837459	155837460	GiM-25i(1)	1	+	155837459	155837460	0,192,0
chr1	156053926	156053927	GiM-14i(2)	2	-	156053926	156053927	255,0,0
chr1	156665136	156665137	GiM-13i(3)	3	-	156665136	156665137	255,0,0
chr1	156928650	156928651	GiM-17i(1)	1	+	156928650	156928651	0,192,0
chr1	156991405	156991406	GiM-22i(5)	5	+	156991405	156991406	0,192,0
chr1	157000321	157000322	GiM-23i(1)	1	+	157000321	157000322	0,192,0
chr1	157000380	157000381	GiM-15i(4)	4	-	157000380	157000381	255,0,0
chr1	157000416	157000417	GiM-19i(2)	2	-	157000416	157000417	255,0,0
chr1	157000991	157000992	GiM-9i(1)	1	-	157000991	157000992	255,0,0
chr1	157001430	157001431	GiM-18i(9)	9	-	157001430	157001431	255,0,0
chr1	157001853	157001854	GiM-7i(1)	1	-	157001853	157001854	255,0,0
chr1	157001867	157001868	GiM-19i(1)	1	+	157001867	157001868	0,192,0
chr1	157001924	157001925	GiM-8i(3)	3	-	157001924	157001925	255,0,0
chr1	157002119	157002120	GiM-4i(1)	1	+	157002119	157002120	0,192,0
chr1	157002841	157002842	GiM-8i(2)	2	+	157002841	157002842	0,192,0
chr1	157004964	157004965	GiM-5i(3)	3	-	157004964	157004965	255,0,0
chr1	157025689	157025690	GiM-25i(1)	1	+	157025689	157025690	0,192,0
chr1	157049201	157049202	GiM-6i(4)	4	-	157049201	157049202	255,0,0
chr1	157071273	157071274	GiM-12i(1)	1	+	157071273	157071274	0,192,0
chr1	157631260	157631261	GiM-5i(2)	2	-	157631260	157631261	255,0,0
chr1	157657642	157657643	GiM-7i(1)	1	-	157657642	157657643	255,0,0
chr1	157689780	157689781	GiM-1i(1)	1	-	157689780	157689781	255,0,0
chr1	157689843	157689844	GiM-18i(1)	1	-	157689843	157689844	255,0,0
chr1	157935203	157935204	GiM-16i(1)	1	+	157935203	157935204	0,192,0
chr1	157937120	157937121	GiM-23i(2)	2	+	157937120	157937121	0,192,0
chr1	157938742	157938743	GiM-13i(6)	6	-	157938742	157938743	255,0,0
chr1	158327901	158327902	GiM-16i(1)	1	+	158327901	158327902	0,192,0
chr1	158337703	158337704	GiM-16i(1)	1	+	158337703	158337704	0,192,0
chr1	158338128	158338129	GiM-7i(2)	2	+	158338128	158338129	0,192,0
chr1	158361773	158361774	GiM-15i(1)	1	+	158361773	158361774	0,192,0
chr1	158681862	158681863	GiM-19i(1)	1	-	158681862	158681863	255,0,0
chr1	158841341	158841342	GiM-8i(1)	1	-	158841341	158841342	255,0,0
chr1	158863422	158863423	GiM-9i(4)	4	-	158863422	158863423	255,0,0
chr1	158920973	158920974	GiM-25i(2)	2	+	158920973	158920974	0,192,0
chr1	158968255	158968256	GiM-19i(1)	1	-	158968255	158968256	255,0,0
chr1	161869147	161869148	GiM-18i(1)	1	+	161869147	161869148	0,192,0
chr1	161870318	161870319	GiM-6i(2)	2	+	161870318	161870319	0,192,0
chr1	161938761	161938762	GiM-16i(1)	1	+	161938761	161938762	0,192,0
chr1	161949269	161949270	GiM-11i(1)	1	+	161949269	161949270	0,192,0
chr1	161951686	161951687	GiM-27i(2)	2	-	161951686	161951687	255,0,0
chr1	161953801	161953802	GiM-11i(5)	5	+	161953801	161953802	0,192,0
chr1	161954347	161954348	GiM-3i(4)	4	+	161954347	161954348	0,192,0
chr1	162008356	162008357	GiM-9i(1)	1	-	162008356	162008357	255,0,0
chr1	162237083	162237084	GiM-23i(1)	1	-	162237083	162237084	255,0,0
chr1	162237923	162237924	GiM-9i(13)	13	+	162237923	162237924	0,192,0
chr1	162256405	162256406	GiM-28i(2)	2	+	162256405	162256406	0,192,0
chr1	163180808	163180809	GiM-26i(2)	2	+	163180808	163180809	0,192,0
chr1	164212997	164212998	GiM-6i(1)	1	-	164212997	164212998	255,0,0
chr1	164500159	164500160	GiM-28i(1)	1	+	164500159	164500160	0,192,0
chr1	166001348	166001349	GiM-16i(7)	7	+	166001348	166001349	0,192,0
chr1	166002169	166002170	GiM-26i(2)	2	+	166002169	166002170	0,192,0
chr1	166002285	166002286	GiM-22i(2)	2	-	166002285	166002286	255,0,0
chr1	166009351	166009352	GiM-28i(2)	2	-	166009351	166009352	255,0,0
chr1	166951617	166951618	GiM-1i(3)	3	+	166951617	166951618	0,192,0
chr1	167081697	167081698	GiM-13i(1)	1	-	167081697	167081698	255,0,0
chr1	167082606	167082607	GiM-20i(4)	4	+	167082606	167082607	0,192,0
chr1	167083833	167083834	GiM-5i(1)	1	+	167083833	167083834	0,192,0
chr1	167105623	167105624	GiM-3i(13)	13	-	167105623	167105624	255,0,0
chr1	167123963	167123964	GiM-25i(3)	3	+	167123963	167123964	0,192,0
chr1	167630401	167630402	GiM-3i(9)	9	-	167630401	167630402	255,0,0
chr1	167630471	167630472	GiM-23i(1)	1	-	167630471	167630472	255,0,0
chr1	167638994	167638995	GiM-9i(1)	1	+	167638994	167638995	0,192,0
chr1	167639055	167639056	GiM-22i(3)	3	+	167639055	167639056	0,192,0
chr1	167639585	167639586	GiM-5i(1)	1	-	167639585	167639586	255,0,0
chr1	167639716	167639717	GiM-27i(2)	2	+	167639716	167639717	0,192,0
chr1	167640598	167640599	GiM-11i(1)	1	+	167640598	167640599	0,192,0
chr1	167640686	167640687	GiM-8i(2)	2	+	167640686	167640687	0,192,0
chr1	167640696	167640697	GiM-16i(2)	2	+	167640696	167640697	0,192,0
chr1	167640724	167640725	GiM-12i(1)	1	+	167640724	167640725	0,192,0
chr1	167641161	167641162	GiM-24i(3)	3	+	167641161	167641162	0,192,0
chr1	167642029	167642030	GiM-15i(1)	1	-	167642029	167642030	255,0,0
chr1	167642045	167642046	GiM-7i(1)	1	-	167642045	167642046	255,0,0
chr1	167643118	167643119	GiM-12i(4)	4	+	167643118	167643119	0,192,0
chr1	167649235	167649236	GiM-14i(5)	5	+	167649235	167649236	0,192,0
chr1	167690654	167690655	GiM-18i(2)	2	-	167690654	167690655	255,0,0
chr1	167731958	167731959	GiM-19i(1)	1	-	167731958	167731959	255,0,0
chr1	167734633	167734634	GiM-8i(3)	3	-	167734633	167734634	255,0,0
chr1	167740834	167740835	GiM-28i(2)	2	+	167740834	167740835	0,192,0
chr1	167742858	167742859	GiM-26i(3)	3	-	167742858	167742859	255,0,0
chr1	167743710	167743711	GiM-10i(1)	1	-	167743710	167743711	255,0,0
chr1	167756064	167756065	GiM-22i(1)	1	-	167756064	167756065	255,0,0
chr1	167771175	167771176	GiM-13i(2)	2	-	167771175	167771176	255,0,0
chr1	167772853	167772854	GiM-19i(2)	2	-	167772853	167772854	255,0,0
chr1	167773422	167773423	GiM-7i(1)	1	-	167773422	167773423	255,0,0
chr1	167778472	167778473	GiM-10i(1)	1	+	167778472	167778473	0,192,0
chr1	167778561	167778562	GiM-16i(2)	2	+	167778561	167778562	0,192,0
chr1	167946293	167946294	GiM-8i(1)	1	+	167946293	167946294	0,192,0
chr1	168337081	168337082	GiM-17i(5)	5	+	168337081	168337082	0,192,0
chr1	168775434	168775435	GiM-8i(2)	2	+	168775434	168775435	0,192,0
chr1	168830094	168830095	GiM-13i(1)	1	+	168830094	168830095	0,192,0
chr1	169173609	169173610	GiM-26i(2)	2	-	169173609	169173610	255,0,0
chr1	169174992	169174993	GiM-18i(3)	3	+	169174992	169174993	0,192,0
chr1	169214236	169214237	GiM-9i(1)	1	+	169214236	169214237	0,192,0
chr1	169807954	169807955	GiM-27i(1)	1	+	169807954	169807955	0,192,0
chr1	170287511	170287512	GiM-28i(2)	2	-	170287511	170287512	255,0,0
chr1	172733233	172733234	GiM-11i(7)	7	-	172733233	172733234	255,0,0
chr1	172774722	172774723	GiM-27i(1)	1	-	172774722	172774723	255,0,0
chr1	172790988	172790989	GiM-13i(5)	5	+	172790988	172790989	0,192,0
chr1	172990775	172990776	GiM-6i(2)	2	-	172990775	172990776	255,0,0
chr1	172991747	172991748	GiM-24i(1)	1	-	172991747	172991748	255,0,0
chr1	173218487	173218488	GiM-16i(3)	3	-	173218487	173218488	255,0,0
chr1	173224689	173224690	GiM-6i(2)	2	+	173224689	173224690	0,192,0
chr1	173320182	173320183	GiM-6i(2)	2	+	173320182	173320183	0,192,0
chr1	173418956	173418957	GiM-10i(2)	2	-	173418956	173418957	255,0,0
chr1	173537718	173537719	GiM-16i(1)	1	-	173537718	173537719	255,0,0
chr1	173603801	173603802	GiM-11i(2)	2	+	173603801	173603802	0,192,0
chr1	173713519	173713520	GiM-23i(7)	7	-	173713519	173713520	255,0,0
chr1	173713670	173713671	GiM-26i(2)	2	+	173713670	173713671	0,192,0
chr1	173770981	173770982	GiM-26i(3)	3	-	173770981	173770982	255,0,0
chr1	173778670	173778671	GiM-5i(1)	1	+	173778670	173778671	0,192,0
chr1	173849065	173849066	GiM-8i(2)	2	+	173849065	173849066	0,192,0
chr1	173849167	173849168	GiM-17i(1)	1	-	173849167	173849168	255,0,0
chr1	173851318	173851319	GiM-23i(1)	1	+	173851318	173851319	0,192,0
chr1	173851784	173851785	GiM-8i(1)	1	-	173851784	173851785	255,0,0
chr1	173852451	173852452	GiM-28i(3)	3	+	173852451	173852452	0,192,0
chr1	173893040	173893041	GiM-15i(1)	1	+	173893040	173893041	0,192,0
chr1	173894155	173894156	GiM-20i(2)	2	+	173894155	173894156	0,192,0
chr1	173946786	173946787	GiM-17i(4)	4	+	173946786	173946787	0,192,0
chr1	173947146	173947147	GiM-12i(5)	5	+	173947146	173947147	0,192,0
chr1	173956558	173956559	GiM-26i(2)	2	-	173956558	173956559	255,0,0
chr1	174077908	174077909	GiM-4i(1)	1	+	174077908	174077909	0,192,0
chr1	174079396	174079397	GiM-13i(2)	2	+	174079396	174079397	0,192,0
chr1	174079400	174079401	GiM-2i(1)	1	+	174079400	174079401	0,192,0
chr1	174239963	174239964	GiM-16i(6)	6	+	174239963	174239964	0,192,0
chr1	174298786	174298787	GiM-11i(1)	1	-	174298786	174298787	255,0,0
chr1	174444083	174444084	GiM-2i(1)	1	-	174444083	174444084	255,0,0
chr1	175672544	175672545	GiM-20i(4)	4	-	175672544	175672545	255,0,0
chr1	177570194	177570195	GiM-5i(2)	2	+	177570194	177570195	0,192,0
chr1	177570287	177570288	GiM-16i(8)	8	-	177570287	177570288	255,0,0
chr1	177811159	177811160	GiM-11i(2)	2	-	177811159	177811160	255,0,0
chr1	178256138	178256139	GiM-22i(2)	2	-	178256138	178256139	255,0,0
chr1	178877309	178877310	GiM-8i(1)	1	+	178877309	178877310	0,192,0
chr1	180249407	180249408	GiM-20i(7)	7	+	180249407	180249408	0,192,0
chr1	180265910	180265911	GiM-7i(2)	2	+	180265910	180265911	0,192,0
chr1	180299797	180299798	GiM-12i(1)	1	+	180299797	180299798	0,192,0
chr1	180299899	180299900	GiM-7i(2)	2	-	180299899	180299900	255,0,0
chr1	180337360	180337361	GiM-16i(1)	1	-	180337360	180337361	255,0,0
chr1	180988568	180988569	GiM-23i(2)	2	+	180988568	180988569	0,192,0
chr1	181450321	181450322	GiM-6i(1)	1	+	181450321	181450322	0,192,0
chr1	181477245	181477246	GiM-3i(1)	1	+	181477245	181477246	0,192,0
chr1	181477366	181477367	GiM-5i(2)	2	+	181477366	181477367	0,192,0
chr1	181517916	181517917	GiM-12i(1)	1	+	181517916	181517917	0,192,0
chr1	181518552	181518553	GiM-25i(2)	2	-	181518552	181518553	255,0,0
chr1	182225715	182225716	GiM-10i(2)	2	+	182225715	182225716	0,192,0
chr1	182244060	182244061	GiM-13i(4)	4	-	182244060	182244061	255,0,0
chr1	182261797	182261798	GiM-19i(1)	1	-	182261797	182261798	255,0,0
chr1	182265019	182265020	GiM-15i(1)	1	-	182265019	182265020	255,0,0
chr1	182268378	182268379	GiM-6i(4)	4	+	182268378	182268379	0,192,0
chr1	182286164	182286165	GiM-10i(2)	2	+	182286164	182286165	0,192,0
chr1	182296424	182296425	GiM-21i(1)	1	+	182296424	182296425	0,192,0
chr1	182297068	182297069	GiM-15i(7)	7	+	182297068	182297069	0,192,0
chr1	182322570	182322571	GiM-20i(7)	7	-	182322570	182322571	255,0,0
chr1	182477186	182477187	GiM-19i(1)	1	-	182477186	182477187	255,0,0
chr1	182478623	182478624	GiM-7i(4)	4	+	182478623	182478624	0,192,0
chr1	182660576	182660577	GiM-24i(1)	1	+	182660576	182660577	0,192,0
chr1	182707645	182707646	GiM-10i(1)	1	-	182707645	182707646	255,0,0
chr1	182708676	182708677	GiM-7i(2)	2	-	182708676	182708677	255,0,0
chr1	182778880	182778881	GiM-23i(3)	3	+	182778880	182778881	0,192,0
chr1	182804822	182804823	GiM-24i(1)	1	+	182804822	182804823	0,192,0
chr1	182804918	182804919	GiM-5i(10)	10	+	182804918	182804919	0,192,0
chr1	182805018	182805019	GiM-8i(3)	3	+	182805018	182805019	0,192,0
chr1	182814255	182814256	GiM-4i(1)	1	+	182814255	182814256	0,192,0
chr1	182815242	182815243	GiM-24i(1)	1	-	182815242	182815243	255,0,0
chr1	182815427	182815428	GiM-25i(2)	2	+	182815427	182815428	0,192,0
chr1	182815526	182815527	GiM-7i(1)	1	+	182815526	182815527	0,192,0
chr1	182835101	182835102	GiM-22i(6)	6	+	182835101	182835102	0,192,0
chr1	182836365	182836366	GiM-10i(9)	9	-	182836365	182836366	255,0,0
chr1	182837986	182837987	GiM-4i(4)	4	+	182837986	182837987	0,192,0
chr1	182840718	182840719	GiM-23i(2)	2	-	182840718	182840719	255,0,0
chr1	182841521	182841522	GiM-26i(2)	2	-	182841521	182841522	255,0,0
chr1	182871647	182871648	GiM-10i(1)	1	-	182871647	182871648	255,0,0
chr1	182942171	182942172	GiM-7i(1)	1	-	182942171	182942172	255,0,0
chr1	183157296	183157297	GiM-6i(1)	1	+	183157296	183157297	0,192,0
chr1	183157644	183157645	GiM-16i(1)	1	-	183157644	183157645	255,0,0
chr1	183158370	183158371	GiM-22i(1)	1	-	183158370	183158371	255,0,0
chr1	183158487	183158488	GiM-2i(1)	1	+	183158487	183158488	0,192,0
chr1	183158616	183158617	GiM-20i(7)	7	-	183158616	183158617	255,0,0
chr1	183160179	183160180	GiM-3i(1)	1	+	183160179	183160180	0,192,0
chr1	183160388	183160389	GiM-10i(2)	2	+	183160388	183160389	0,192,0
chr1	183161202	183161203	GiM-25i(1)	1	+	183161202	183161203	0,192,0
chr1	183162467	183162468	GiM-7i(1)	1	-	183162467	183162468	255,0,0
chr1	183788705	183788706	GiM-12i(2)	2	+	183788705	183788706	0,192,0
chr1	183789087	183789088	GiM-24i(1)	1	+	183789087	183789088	0,192,0
chr1	183790092	183790093	GiM-8i(17)	17	-	183790092	183790093	255,0,0
chr1	183790206	183790207	GiM-25i(2)	2	+	183790206	183790207	0,192,0
chr1	183791802	183791803	GiM-21i(4)	4	-	183791802	183791803	255,0,0
chr1	183793003	183793004	GiM-3i(3)	3	-	183793003	183793004	255,0,0
chr1	183795820	183795821	GiM-18i(5)	5	-	183795820	183795821	255,0,0
chr1	183803900	183803901	GiM-24i(1)	1	+	183803900	183803901	0,192,0
chr1	184141010	184141011	GiM-8i(1)	1	+	184141010	184141011	0,192,0
chr1	184223276	184223277	GiM-6i(1)	1	-	184223276	184223277	255,0,0
chr1	185502493	185502494	GiM-10i(2)	2	+	185502493	185502494	0,192,0
chr1	185838938	185838939	GiM-10i(1)	1	-	185838938	185838939	255,0,0
chr1	185839821	185839822	GiM-22i(1)	1	-	185839821	185839822	255,0,0
chr1	185925188	185925189	GiM-7i(3)	3	+	185925188	185925189	0,192,0
chr1	185925997	185925998	GiM-11i(1)	1	-	185925997	185925998	255,0,0
chr1	185941860	185941861	GiM-26i(1)	1	-	185941860	185941861	255,0,0
chr1	186215080	186215081	GiM-17i(4)	4	-	186215080	186215081	255,0,0
chr1	187000128	187000129	GiM-27i(2)	2	+	187000128	187000129	0,192,0
chr1	189172235	189172236	GiM-19i(1)	1	+	189172235	189172236	0,192,0
chr1	191412397	191412398	GiM-21i(2)	2	+	191412397	191412398	0,192,0
chr1	191605424	191605425	GiM-26i(2)	2	+	191605424	191605425	0,192,0
chr1	191605475	191605476	GiM-23i(2)	2	+	191605475	191605476	0,192,0
chr1	191606080	191606081	GiM-12i(3)	3	+	191606080	191606081	0,192,0
chr1	191620804	191620805	GiM-5i(1)	1	-	191620804	191620805	255,0,0
chr1	191622255	191622256	GiM-23i(2)	2	+	191622255	191622256	0,192,0
chr1	191622330	191622331	GiM-15i(7)	7	-	191622330	191622331	255,0,0
chr1	191623541	191623542	GiM-13i(1)	1	-	191623541	191623542	255,0,0
chr1	191653873	191653874	GiM-28i(2)	2	-	191653873	191653874	255,0,0
chr1	191654120	191654121	GiM-24i(2)	2	-	191654120	191654121	255,0,0
chr1	191654586	191654587	GiM-26i(3)	3	+	191654586	191654587	0,192,0
chr1	191654736	191654737	GiM-16i(2)	2	-	191654736	191654737	255,0,0
chr1	191655902	191655903	GiM-27i(6)	6	-	191655902	191655903	255,0,0
chr1	192736550	192736551	GiM-26i(2)	2	+	192736550	192736551	0,192,0
chr1	192935436	192935437	GiM-19i(1)	1	-	192935436	192935437	255,0,0
chr1	193217359	193217360	GiM-12i(3)	3	+	193217359	193217360	0,192,0
chr1	193228162	193228163	GiM-28i(3)	3	+	193228162	193228163	0,192,0
chr1	193241913	193241914	GiM-22i(1)	1	+	193241913	193241914	0,192,0
chr1	193242394	193242395	GiM-2i(4)	4	-	193242394	193242395	255,0,0
chr1	193244282	193244283	GiM-2i(4)	4	-	193244282	193244283	255,0,0
chr1	193247894	193247895	GiM-22i(3)	3	+	193247894	193247895	0,192,0
chr1	193249181	193249182	GiM-2i(5)	5	+	193249181	193249182	0,192,0
chr1	193265987	193265988	GiM-27i(1)	1	+	193265987	193265988	0,192,0
chr1	193268734	193268735	GiM-9i(1)	1	+	193268734	193268735	0,192,0
chr1	193302746	193302747	GiM-10i(1)	1	-	193302746	193302747	255,0,0
chr1	193303536	193303537	GiM-13i(9)	9	+	193303536	193303537	0,192,0
chr1	193303608	193303609	GiM-11i(11)	11	-	193303608	193303609	255,0,0
chr1	193342773	193342774	GiM-10i(2)	2	+	193342773	193342774	0,192,0
chr1	193343375	193343376	GiM-21i(1)	1	+	193343375	193343376	0,192,0
chr1	193344860	193344861	GiM-19i(1)	1	-	193344860	193344861	255,0,0
chr1	193345110	193345111	GiM-10i(1)	1	+	193345110	193345111	0,192,0
chr1	193363514	193363515	GiM-16i(3)	3	+	193363514	193363515	0,192,0
chr1	193389067	193389068	GiM-2i(2)	2	+	193389067	193389068	0,192,0
chr1	193900860	193900861	GiM-22i(2)	2	-	193900860	193900861	255,0,0
chr1	193910761	193910762	GiM-28i(2)	2	+	193910761	193910762	0,192,0
chr1	193923246	193923247	GiM-17i(1)	1	-	193923246	193923247	255,0,0
chr1	193939942	193939943	GiM-28i(1)	1	+	193939942	193939943	0,192,0
chr1	194908629	194908630	GiM-28i(1)	1	-	194908629	194908630	255,0,0
chr1	194912947	194912948	GiM-9i(2)	2	-	194912947	194912948	255,0,0
chr1	194913797	194913798	GiM-8i(1)	1	-	194913797	194913798	255,0,0
chr1	194948454	194948455	GiM-18i(2)	2	-	194948454	194948455	255,0,0
chr1	194985958	194985959	GiM-8i(1)	1	+	194985958	194985959	0,192,0
chr1	194999549	194999550	GiM-6i(1)	1	+	194999549	194999550	0,192,0
chr1	195000208	195000209	GiM-5i(2)	2	-	195000208	195000209	255,0,0
chr1	195029480	195029481	GiM-21i(1)	1	-	195029480	195029481	255,0,0
chr1	195165188	195165189	GiM-16i(1)	1	-	195165188	195165189	255,0,0
chr1	195247191	195247192	GiM-2i(3)	3	-	195247191	195247192	255,0,0
chr1	195272924	195272925	GiM-8i(1)	1	+	195272924	195272925	0,192,0
chr1	195559464	195559465	GiM-22i(2)	2	+	195559464	195559465	0,192,0
chr1	196280606	196280607	GiM-19i(3)	3	+	196280606	196280607	0,192,0
chr1	196957073	196957074	GiM-20i(2)	2	+	196957073	196957074	0,192,0
chr10	3366380	3366381	GiM-16i(1)	1	+	3366380	3366381	0,192,0
chr10	4539824	4539825	GiM-12i(2)	2	-	4539824	4539825	255,0,0
chr10	5187984	5187985	GiM-11i(1)	1	-	5187984	5187985	255,0,0
chr10	5275278	5275279	GiM-20i(2)	2	-	5275278	5275279	255,0,0
chr10	5445510	5445511	GiM-9i(3)	3	-	5445510	5445511	255,0,0
chr10	6245575	6245576	GiM-18i(4)	4	-	6245575	6245576	255,0,0
chr10	7446302	7446303	GiM-13i(2)	2	+	7446302	7446303	0,192,0
chr10	7677561	7677562	GiM-19i(1)	1	+	7677561	7677562	0,192,0
chr10	7786530	7786531	GiM-19i(1)	1	-	7786530	7786531	255,0,0
chr10	7932986	7932987	GiM-22i(4)	4	-	7932986	7932987	255,0,0
chr10	12086930	12086931	GiM-17i(3)	3	-	12086930	12086931	255,0,0
chr10	12274461	12274462	GiM-9i(1)	1	+	12274461	12274462	0,192,0
chr10	12302789	12302790	GiM-15i(2)	2	+	12302789	12302790	0,192,0
chr10	12316825	12316826	GiM-21i(5)	5	-	12316825	12316826	255,0,0
chr10	12532729	12532730	GiM-21i(1)	1	-	12532729	12532730	255,0,0
chr10	12684398	12684399	GiM-4i(1)	1	-	12684398	12684399	255,0,0
chr10	12766230	12766231	GiM-28i(6)	6	-	12766230	12766231	255,0,0
chr10	13219762	13219763	GiM-28i(1)	1	-	13219762	13219763	255,0,0
chr10	13648170	13648171	GiM-23i(1)	1	-	13648170	13648171	255,0,0
chr10	13649025	13649026	GiM-7i(1)	1	+	13649025	13649026	0,192,0
chr10	13649111	13649112	GiM-13i(2)	2	-	13649111	13649112	255,0,0
chr10	13702559	13702560	GiM-11i(2)	2	+	13702559	13702560	0,192,0
chr10	13767155	13767156	GiM-28i(2)	2	-	13767155	13767156	255,0,0
chr10	17449748	17449749	GiM-23i(1)	1	+	17449748	17449749	0,192,0
chr10	17708304	17708305	GiM-10i(1)	1	-	17708304	17708305	255,0,0
chr10	18383830	18383831	GiM-19i(9)	9	-	18383830	18383831	255,0,0
chr10	18384484	18384485	GiM-3i(1)	1	-	18384484	18384485	255,0,0
chr10	18388147	18388148	GiM-22i(1)	1	-	18388147	18388148	255,0,0
chr10	18672810	18672811	GiM-6i(3)	3	+	18672810	18672811	0,192,0
chr10	18672846	18672847	GiM-15i(3)	3	-	18672846	18672847	255,0,0
chr10	18715945	18715946	GiM-28i(3)	3	-	18715945	18715946	255,0,0
chr10	18733710	18733711	GiM-17i(4)	4	+	18733710	18733711	0,192,0
chr10	18897296	18897297	GiM-16i(3)	3	+	18897296	18897297	0,192,0
chr10	18909501	18909502	GiM-27i(1)	1	-	18909501	18909502	255,0,0
chr10	18915597	18915598	GiM-17i(2)	2	+	18915597	18915598	0,192,0
chr10	19216166	19216167	GiM-28i(1)	1	+	19216166	19216167	0,192,0
chr10	19245551	19245552	GiM-13i(10)	10	-	19245551	19245552	255,0,0
chr10	19245585	19245586	GiM-19i(1)	1	+	19245585	19245586	0,192,0
chr10	19283773	19283774	GiM-1i(1)	1	-	19283773	19283774	255,0,0
chr10	19285238	19285239	GiM-10i(2)	2	+	19285238	19285239	0,192,0
chr10	19286292	19286293	GiM-1i(2)	2	+	19286292	19286293	0,192,0
chr10	19286927	19286928	GiM-3i(1)	1	-	19286927	19286928	255,0,0
chr10	19289337	19289338	GiM-2i(1)	1	-	19289337	19289338	255,0,0
chr10	19289790	19289791	GiM-9i(1)	1	-	19289790	19289791	255,0,0
chr10	19298583	19298584	GiM-21i(2)	2	+	19298583	19298584	0,192,0
chr10	19299572	19299573	GiM-5i(2)	2	+	19299572	19299573	0,192,0
chr10	19303628	19303629	GiM-27i(2)	2	-	19303628	19303629	255,0,0
chr10	19307113	19307114	GiM-13i(3)	3	-	19307113	19307114	255,0,0
chr10	19307158	19307159	GiM-2i(1)	1	-	19307158	19307159	255,0,0
chr10	19308232	19308233	GiM-27i(1)	1	+	19308232	19308233	0,192,0
chr10	19309906	19309907	GiM-25i(3)	3	-	19309906	19309907	255,0,0
chr10	19315501	19315502	GiM-14i(1)	1	+	19315501	19315502	0,192,0
chr10	19384358	19384359	GiM-1i(6)	6	+	19384358	19384359	0,192,0
chr10	19712691	19712692	GiM-10i(1)	1	+	19712691	19712692	0,192,0
chr10	19978424	19978425	GiM-26i(1)	1	-	19978424	19978425	255,0,0
chr10	20252396	20252397	GiM-8i(1)	1	+	20252396	20252397	0,192,0
chr10	20712069	20712070	GiM-21i(8)	8	+	20712069	20712070	0,192,0
chr10	20713397	20713398	GiM-18i(1)	1	-	20713397	20713398	255,0,0
chr10	20717011	20717012	GiM-26i(3)	3	+	20717011	20717012	0,192,0
chr10	20718467	20718468	GiM-13i(1)	1	+	20718467	20718468	0,192,0
chr10	20718971	20718972	GiM-5i(2)	2	+	20718971	20718972	0,192,0
chr10	20750987	20750988	GiM-20i(2)	2	+	20750987	20750988	0,192,0
chr10	20759380	20759381	GiM-11i(1)	1	+	20759380	20759381	0,192,0
chr10	20760248	20760249	GiM-18i(2)	2	+	20760248	20760249	0,192,0
chr10	20765252	20765253	GiM-13i(2)	2	+	20765252	20765253	0,192,0
chr10	20767771	20767772	GiM-19i(1)	1	-	20767771	20767772	255,0,0
chr10	20767914	20767915	GiM-11i(2)	2	-	20767914	20767915	255,0,0
chr10	20768106	20768107	GiM-9i(4)	4	+	20768106	20768107	0,192,0
chr10	20769302	20769303	GiM-18i(9)	9	+	20769302	20769303	0,192,0
chr10	20769840	20769841	GiM-24i(1)	1	+	20769840	20769841	0,192,0
chr10	20770024	20770025	GiM-23i(1)	1	+	20770024	20770025	0,192,0
chr10	20770055	20770056	GiM-26i(5)	5	-	20770055	20770056	255,0,0
chr10	20770202	20770203	GiM-2i(3)	3	-	20770202	20770203	255,0,0
chr10	20771792	20771793	GiM-21i(2)	2	+	20771792	20771793	0,192,0
chr10	20772909	20772910	GiM-21i(1)	1	+	20772909	20772910	0,192,0
chr10	20774222	20774223	GiM-21i(1)	1	-	20774222	20774223	255,0,0
chr10	20774976	20774977	GiM-5i(5)	5	+	20774976	20774977	0,192,0
chr10	20783959	20783960	GiM-16i(1)	1	+	20783959	20783960	0,192,0
chr10	20784048	20784049	GiM-22i(2)	2	+	20784048	20784049	0,192,0
chr10	20784291	20784292	GiM-1i(5)	5	-	20784291	20784292	255,0,0
chr10	20785393	20785394	GiM-9i(14)	14	-	20785393	20785394	255,0,0
chr10	20785720	20785721	GiM-24i(1)	1	+	20785720	20785721	0,192,0
chr10	20786254	20786255	GiM-12i(8)	8	+	20786254	20786255	0,192,0
chr10	20786306	20786307	GiM-19i(2)	2	-	20786306	20786307	255,0,0
chr10	20786329	20786330	GiM-9i(1)	1	-	20786329	20786330	255,0,0
chr10	20786333	20786334	GiM-25i(4)	4	-	20786333	20786334	255,0,0
chr10	20786350	20786351	GiM-7i(2)	2	-	20786350	20786351	255,0,0
chr10	20786726	20786727	GiM-15i(1)	1	+	20786726	20786727	0,192,0
chr10	20786817	20786818	GiM-26i(1)	1	+	20786817	20786818	0,192,0
chr10	20786858	20786859	GiM-13i(1)	1	+	20786858	20786859	0,192,0
chr10	20787050	20787051	GiM-19i(2)	2	+	20787050	20787051	0,192,0
chr10	20787139	20787140	GiM-17i(3)	3	+	20787139	20787140	0,192,0
chr10	20787401	20787402	GiM-18i(1)	1	+	20787401	20787402	0,192,0
chr10	20787790	20787791	GiM-24i(3)	3	+	20787790	20787791	0,192,0
chr10	20787793	20787794	GiM-23i(1)	1	+	20787793	20787794	0,192,0
chr10	20788271	20788272	GiM-21i(1)	1	+	20788271	20788272	0,192,0
chr10	20788347	20788348	GiM-8i(9)	9	+	20788347	20788348	0,192,0
chr10	20788640	20788641	GiM-8i(1)	1	+	20788640	20788641	0,192,0
chr10	20791051	20791052	GiM-21i(4)	4	-	20791051	20791052	255,0,0
chr10	20796020	20796021	GiM-10i(2)	2	+	20796020	20796021	0,192,0
chr10	20796851	20796852	GiM-8i(2)	2	+	20796851	20796852	0,192,0
chr10	20797097	20797098	GiM-13i(1)	1	+	20797097	20797098	0,192,0
chr10	20797121	20797122	GiM-15i(4)	4	+	20797121	20797122	0,192,0
chr10	20797131	20797132	GiM-24i(1)	1	+	20797131	20797132	0,192,0
chr10	20798240	20798241	GiM-13i(4)	4	+	20798240	20798241	0,192,0
chr10	20798329	20798330	GiM-21i(4)	4	+	20798329	20798330	0,192,0
chr10	20798373	20798374	GiM-19i(1)	1	+	20798373	20798374	0,192,0
chr10	20798387	20798388	GiM-20i(13)	13	+	20798387	20798388	0,192,0
chr10	20799719	20799720	GiM-28i(2)	2	+	20799719	20799720	0,192,0
chr10	20802758	20802759	GiM-24i(1)	1	+	20802758	20802759	0,192,0
chr10	20804777	20804778	GiM-8i(2)	2	+	20804777	20804778	0,192,0
chr10	20804931	20804932	GiM-10i(1)	1	-	20804931	20804932	255,0,0
chr10	20809935	20809936	GiM-18i(2)	2	+	20809935	20809936	0,192,0
chr10	20811078	20811079	GiM-15i(3)	3	+	20811078	20811079	0,192,0
chr10	20811078	20811079	GiM-19i(2)	2	+	20811078	20811079	0,192,0
chr10	20811531	20811532	GiM-3i(13)	13	-	20811531	20811532	255,0,0
chr10	20811606	20811607	GiM-24i(1)	1	+	20811606	20811607	0,192,0
chr10	20811933	20811934	GiM-19i(2)	2	+	20811933	20811934	0,192,0
chr10	20812047	20812048	GiM-18i(1)	1	+	20812047	20812048	0,192,0
chr10	20812129	20812130	GiM-2i(1)	1	+	20812129	20812130	0,192,0
chr10	20812175	20812176	GiM-11i(3)	3	+	20812175	20812176	0,192,0
chr10	20812275	20812276	GiM-13i(2)	2	-	20812275	20812276	255,0,0
chr10	20813342	20813343	GiM-13i(1)	1	-	20813342	20813343	255,0,0
chr10	20813516	20813517	GiM-3i(1)	1	+	20813516	20813517	0,192,0
chr10	20813724	20813725	GiM-16i(1)	1	+	20813724	20813725	0,192,0
chr10	20813741	20813742	GiM-22i(2)	2	+	20813741	20813742	0,192,0
chr10	20813953	20813954	GiM-16i(4)	4	+	20813953	20813954	0,192,0
chr10	20814572	20814573	GiM-11i(1)	1	+	20814572	20814573	0,192,0
chr10	20815118	20815119	GiM-19i(1)	1	+	20815118	20815119	0,192,0
chr10	20818193	20818194	GiM-26i(1)	1	+	20818193	20818194	0,192,0
chr10	20819772	20819773	GiM-9i(2)	2	+	20819772	20819773	0,192,0
chr10	20819832	20819833	GiM-2i(12)	12	+	20819832	20819833	0,192,0
chr10	20820243	20820244	GiM-19i(1)	1	+	20820243	20820244	0,192,0
chr10	20820939	20820940	GiM-16i(2)	2	+	20820939	20820940	0,192,0
chr10	20821115	20821116	GiM-18i(5)	5	+	20821115	20821116	0,192,0
chr10	20821147	20821148	GiM-10i(3)	3	+	20821147	20821148	0,192,0
chr10	20821189	20821190	GiM-18i(3)	3	+	20821189	20821190	0,192,0
chr10	20821233	20821234	GiM-17i(4)	4	-	20821233	20821234	255,0,0
chr10	20821257	20821258	GiM-21i(6)	6	+	20821257	20821258	0,192,0
chr10	20821550	20821551	GiM-24i(1)	1	+	20821550	20821551	0,192,0
chr10	20832633	20832634	GiM-9i(1)	1	+	20832633	20832634	0,192,0
chr10	20833536	20833537	GiM-15i(1)	1	+	20833536	20833537	0,192,0
chr10	20834495	20834496	GiM-20i(1)	1	+	20834495	20834496	0,192,0
chr10	20839937	20839938	GiM-17i(2)	2	+	20839937	20839938	0,192,0
chr10	20840143	20840144	GiM-13i(11)	11	+	20840143	20840144	0,192,0
chr10	20840160	20840161	GiM-24i(2)	2	+	20840160	20840161	0,192,0
chr10	20840948	20840949	GiM-27i(1)	1	+	20840948	20840949	0,192,0
chr10	20841150	20841151	GiM-13i(3)	3	+	20841150	20841151	0,192,0
chr10	20841190	20841191	GiM-19i(3)	3	+	20841190	20841191	0,192,0
chr10	20841478	20841479	GiM-16i(4)	4	+	20841478	20841479	0,192,0
chr10	20882808	20882809	GiM-8i(1)	1	-	20882808	20882809	255,0,0
chr10	20904197	20904198	GiM-21i(9)	9	-	20904197	20904198	255,0,0
chr10	20906435	20906436	GiM-13i(3)	3	-	20906435	20906436	255,0,0
chr10	20912225	20912226	GiM-18i(4)	4	-	20912225	20912226	255,0,0
chr10	20915630	20915631	GiM-16i(1)	1	-	20915630	20915631	255,0,0
chr10	20916059	20916060	GiM-17i(9)	9	-	20916059	20916060	255,0,0
chr10	20916077	20916078	GiM-25i(5)	5	-	20916077	20916078	255,0,0
chr10	20916443	20916444	GiM-11i(3)	3	+	20916443	20916444	0,192,0
chr10	20916897	20916898	GiM-16i(1)	1	-	20916897	20916898	255,0,0
chr10	20924428	20924429	GiM-2i(1)	1	-	20924428	20924429	255,0,0
chr10	20938593	20938594	GiM-10i(1)	1	-	20938593	20938594	255,0,0
chr10	20940648	20940649	GiM-9i(3)	3	-	20940648	20940649	255,0,0
chr10	20940664	20940665	GiM-1i(2)	2	-	20940664	20940665	255,0,0
chr10	20941779	20941780	GiM-27i(2)	2	-	20941779	20941780	255,0,0
chr10	20942557	20942558	GiM-24i(3)	3	-	20942557	20942558	255,0,0
chr10	20942606	20942607	GiM-28i(1)	1	-	20942606	20942607	255,0,0
chr10	20943241	20943242	GiM-11i(1)	1	+	20943241	20943242	0,192,0
chr10	20943521	20943522	GiM-7i(5)	5	-	20943521	20943522	255,0,0
chr10	20943569	20943570	GiM-6i(38)	38	+	20943569	20943570	0,192,0
chr10	20943765	20943766	GiM-7i(1)	1	-	20943765	20943766	255,0,0
chr10	20945620	20945621	GiM-9i(1)	1	-	20945620	20945621	255,0,0
chr10	20952977	20952978	GiM-21i(2)	2	-	20952977	20952978	255,0,0
chr10	20954297	20954298	GiM-15i(2)	2	-	20954297	20954298	255,0,0
chr10	20954708	20954709	GiM-19i(2)	2	-	20954708	20954709	255,0,0
chr10	20954746	20954747	GiM-21i(9)	9	-	20954746	20954747	255,0,0
chr10	20955611	20955612	GiM-27i(3)	3	-	20955611	20955612	255,0,0
chr10	20956008	20956009	GiM-23i(1)	1	-	20956008	20956009	255,0,0
chr10	20956024	20956025	GiM-15i(2)	2	+	20956024	20956025	0,192,0
chr10	20956094	20956095	GiM-16i(4)	4	-	20956094	20956095	255,0,0
chr10	20956099	20956100	GiM-20i(3)	3	-	20956099	20956100	255,0,0
chr10	20956104	20956105	GiM-10i(2)	2	-	20956104	20956105	255,0,0
chr10	20956104	20956105	GiM-9i(1)	1	-	20956104	20956105	255,0,0
chr10	20956242	20956243	GiM-23i(2)	2	-	20956242	20956243	255,0,0
chr10	20956262	20956263	GiM-21i(6)	6	-	20956262	20956263	255,0,0
chr10	20956273	20956274	GiM-8i(1)	1	-	20956273	20956274	255,0,0
chr10	20956292	20956293	GiM-20i(1)	1	-	20956292	20956293	255,0,0
chr10	20957389	20957390	GiM-22i(5)	5	-	20957389	20957390	255,0,0
chr10	20957407	20957408	GiM-8i(1)	1	-	20957407	20957408	255,0,0
chr10	20957447	20957448	GiM-13i(3)	3	-	20957447	20957448	255,0,0
chr10	20957581	20957582	GiM-21i(2)	2	-	20957581	20957582	255,0,0
chr10	20957583	20957584	GiM-18i(1)	1	-	20957583	20957584	255,0,0
chr10	20957635	20957636	GiM-24i(3)	3	-	20957635	20957636	255,0,0
chr10	20958341	20958342	GiM-18i(8)	8	+	20958341	20958342	0,192,0
chr10	20958488	20958489	GiM-20i(9)	9	-	20958488	20958489	255,0,0
chr10	20958877	20958878	GiM-4i(5)	5	+	20958877	20958878	0,192,0
chr10	20958943	20958944	GiM-27i(2)	2	-	20958943	20958944	255,0,0
chr10	20959329	20959330	GiM-20i(7)	7	-	20959329	20959330	255,0,0
chr10	20959344	20959345	GiM-19i(4)	4	-	20959344	20959345	255,0,0
chr10	20959403	20959404	GiM-26i(3)	3	+	20959403	20959404	0,192,0
chr10	20959523	20959524	GiM-16i(18)	18	-	20959523	20959524	255,0,0
chr10	20959545	20959546	GiM-24i(3)	3	-	20959545	20959546	255,0,0
chr10	20959680	20959681	GiM-14i(1)	1	+	20959680	20959681	0,192,0
chr10	20959773	20959774	GiM-13i(2)	2	-	20959773	20959774	255,0,0
chr10	20959774	20959775	GiM-21i(3)	3	-	20959774	20959775	255,0,0
chr10	20959915	20959916	GiM-18i(7)	7	-	20959915	20959916	255,0,0
chr10	20960405	20960406	GiM-25i(1)	1	+	20960405	20960406	0,192,0
chr10	20960603	20960604	GiM-18i(7)	7	-	20960603	20960604	255,0,0
chr10	20960932	20960933	GiM-13i(2)	2	-	20960932	20960933	255,0,0
chr10	20962217	20962218	GiM-27i(1)	1	+	20962217	20962218	0,192,0
chr10	20962273	20962274	GiM-1i(7)	7	+	20962273	20962274	0,192,0
chr10	20967570	20967571	GiM-21i(2)	2	-	20967570	20967571	255,0,0
chr10	20968949	20968950	GiM-12i(2)	2	-	20968949	20968950	255,0,0
chr10	20971498	20971499	GiM-22i(3)	3	+	20971498	20971499	0,192,0
chr10	20971577	20971578	GiM-20i(9)	9	-	20971577	20971578	255,0,0
chr10	20971785	20971786	GiM-5i(1)	1	+	20971785	20971786	0,192,0
chr10	20972691	20972692	GiM-14i(1)	1	+	20972691	20972692	0,192,0
chr10	21108801	21108802	GiM-22i(2)	2	-	21108801	21108802	255,0,0
chr10	21188442	21188443	GiM-8i(1)	1	-	21188442	21188443	255,0,0
chr10	21199736	21199737	GiM-11i(2)	2	+	21199736	21199737	0,192,0
chr10	21200136	21200137	GiM-1i(1)	1	+	21200136	21200137	0,192,0
chr10	21224301	21224302	GiM-5i(1)	1	+	21224301	21224302	0,192,0
chr10	21246910	21246911	GiM-7i(1)	1	+	21246910	21246911	0,192,0
chr10	21277487	21277488	GiM-21i(8)	8	+	21277487	21277488	0,192,0
chr10	21477578	21477579	GiM-18i(2)	2	+	21477578	21477579	0,192,0
chr10	21513126	21513127	GiM-15i(2)	2	+	21513126	21513127	0,192,0
chr10	21546910	21546911	GiM-9i(1)	1	-	21546910	21546911	255,0,0
chr10	21625328	21625329	GiM-11i(2)	2	+	21625328	21625329	0,192,0
chr10	21626189	21626190	GiM-20i(1)	1	-	21626189	21626190	255,0,0
chr10	21626191	21626192	GiM-6i(1)	1	-	21626191	21626192	255,0,0
chr10	21627784	21627785	GiM-5i(1)	1	+	21627784	21627785	0,192,0
chr10	21630769	21630770	GiM-4i(6)	6	+	21630769	21630770	0,192,0
chr10	21631789	21631790	GiM-21i(2)	2	-	21631789	21631790	255,0,0
chr10	21869608	21869609	GiM-12i(1)	1	-	21869608	21869609	255,0,0
chr10	23507660	23507661	GiM-4i(4)	4	-	23507660	23507661	255,0,0
chr10	24203349	24203350	GiM-19i(1)	1	-	24203349	24203350	255,0,0
chr10	25156603	25156604	GiM-2i(3)	3	-	25156603	25156604	255,0,0
chr10	25176240	25176241	GiM-16i(1)	1	-	25176240	25176241	255,0,0
chr10	25422104	25422105	GiM-4i(3)	3	+	25422104	25422105	0,192,0
chr10	26059011	26059012	GiM-16i(1)	1	+	26059011	26059012	0,192,0
chr10	28219729	28219730	GiM-16i(3)	3	+	28219729	28219730	0,192,0
chr10	28233844	28233845	GiM-18i(5)	5	-	28233844	28233845	255,0,0
chr10	28234266	28234267	GiM-11i(1)	1	-	28234266	28234267	255,0,0
chr10	28237888	28237889	GiM-18i(1)	1	-	28237888	28237889	255,0,0
chr10	28238313	28238314	GiM-12i(1)	1	+	28238313	28238314	0,192,0
chr10	28288285	28288286	GiM-2i(1)	1	+	28288285	28288286	0,192,0
chr10	28314606	28314607	GiM-28i(1)	1	+	28314606	28314607	0,192,0
chr10	28316517	28316518	GiM-23i(2)	2	+	28316517	28316518	0,192,0
chr10	28352439	28352440	GiM-20i(7)	7	+	28352439	28352440	0,192,0
chr10	28387375	28387376	GiM-20i(9)	9	-	28387375	28387376	255,0,0
chr10	28389390	28389391	GiM-17i(11)	11	-	28389390	28389391	255,0,0
chr10	28419050	28419051	GiM-12i(4)	4	+	28419050	28419051	0,192,0
chr10	29082233	29082234	GiM-28i(1)	1	-	29082233	29082234	255,0,0
chr10	30531002	30531003	GiM-25i(3)	3	-	30531002	30531003	255,0,0
chr10	33831497	33831498	GiM-4i(3)	3	+	33831497	33831498	0,192,0
chr10	33831503	33831504	GiM-14i(2)	2	+	33831503	33831504	0,192,0
chr10	33890340	33890341	GiM-24i(1)	1	-	33890340	33890341	255,0,0
chr10	33891628	33891629	GiM-21i(1)	1	-	33891628	33891629	255,0,0
chr10	34017065	34017066	GiM-14i(2)	2	+	34017065	34017066	0,192,0
chr10	36914670	36914671	GiM-3i(3)	3	+	36914670	36914671	0,192,0
chr10	37054851	37054852	GiM-6i(1)	1	-	37054851	37054852	255,0,0
chr10	37901029	37901030	GiM-9i(1)	1	-	37901029	37901030	255,0,0
chr10	38855555	38855556	GiM-21i(4)	4	+	38855555	38855556	0,192,0
chr10	38855672	38855673	GiM-2i(1)	1	+	38855672	38855673	0,192,0
chr10	38856887	38856888	GiM-5i(5)	5	-	38856887	38856888	255,0,0
chr10	38857081	38857082	GiM-27i(1)	1	+	38857081	38857082	0,192,0
chr10	38857181	38857182	GiM-10i(2)	2	+	38857181	38857182	0,192,0
chr10	38857236	38857237	GiM-26i(5)	5	-	38857236	38857237	255,0,0
chr10	38911783	38911784	GiM-28i(5)	5	-	38911783	38911784	255,0,0
chr10	38912380	38912381	GiM-23i(2)	2	-	38912380	38912381	255,0,0
chr10	38912498	38912499	GiM-19i(6)	6	-	38912498	38912499	255,0,0
chr10	39090912	39090913	GiM-17i(5)	5	+	39090912	39090913	0,192,0
chr10	39128463	39128464	GiM-22i(3)	3	-	39128463	39128464	255,0,0
chr10	39208907	39208908	GiM-18i(1)	1	+	39208907	39208908	0,192,0
chr10	39283915	39283916	GiM-23i(1)	1	-	39283915	39283916	255,0,0
chr10	39619319	39619320	GiM-11i(4)	4	-	39619319	39619320	255,0,0
chr10	39939442	39939443	GiM-15i(2)	2	-	39939442	39939443	255,0,0
chr10	40139432	40139433	GiM-26i(1)	1	-	40139432	40139433	255,0,0
chr10	40142783	40142784	GiM-6i(1)	1	+	40142783	40142784	0,192,0
chr10	40153107	40153108	GiM-28i(1)	1	-	40153107	40153108	255,0,0
chr10	40161602	40161603	GiM-2i(1)	1	+	40161602	40161603	0,192,0
chr10	41196742	41196743	GiM-24i(6)	6	-	41196742	41196743	255,0,0
chr10	41240707	41240708	GiM-13i(4)	4	+	41240707	41240708	0,192,0
chr10	41304247	41304248	GiM-5i(6)	6	-	41304247	41304248	255,0,0
chr10	41318478	41318479	GiM-19i(2)	2	-	41318478	41318479	255,0,0
chr10	41318495	41318496	GiM-23i(3)	3	+	41318495	41318496	0,192,0
chr10	41325164	41325165	GiM-23i(2)	2	+	41325164	41325165	0,192,0
chr10	41335538	41335539	GiM-18i(4)	4	-	41335538	41335539	255,0,0
chr10	41341279	41341280	GiM-16i(1)	1	-	41341279	41341280	255,0,0
chr10	41353390	41353391	GiM-17i(1)	1	-	41353390	41353391	255,0,0
chr10	41359279	41359280	GiM-19i(1)	1	-	41359279	41359280	255,0,0
chr10	41599998	41599999	GiM-27i(1)	1	-	41599998	41599999	255,0,0
chr10	41790098	41790099	GiM-25i(2)	2	-	41790098	41790099	255,0,0
chr10	41792202	41792203	GiM-25i(2)	2	-	41792202	41792203	255,0,0
chr10	41990072	41990073	GiM-22i(1)	1	-	41990072	41990073	255,0,0
chr10	41990965	41990966	GiM-26i(2)	2	-	41990965	41990966	255,0,0
chr10	41993560	41993561	GiM-10i(7)	7	-	41993560	41993561	255,0,0
chr10	42239328	42239329	GiM-28i(1)	1	+	42239328	42239329	0,192,0
chr10	42393608	42393609	GiM-5i(1)	1	-	42393608	42393609	255,0,0
chr10	42568091	42568092	GiM-2i(2)	2	-	42568091	42568092	255,0,0
chr10	42568205	42568206	GiM-13i(2)	2	+	42568205	42568206	0,192,0
chr10	42581633	42581634	GiM-22i(5)	5	+	42581633	42581634	0,192,0
chr10	42581673	42581674	GiM-21i(8)	8	-	42581673	42581674	255,0,0
chr10	42581719	42581720	GiM-1i(1)	1	-	42581719	42581720	255,0,0
chr10	42582896	42582897	GiM-7i(2)	2	+	42582896	42582897	0,192,0
chr10	42583209	42583210	GiM-2i(1)	1	+	42583209	42583210	0,192,0
chr10	42588195	42588196	GiM-3i(8)	8	-	42588195	42588196	255,0,0
chr10	42588252	42588253	GiM-13i(1)	1	+	42588252	42588253	0,192,0
chr10	42591197	42591198	GiM-28i(1)	1	+	42591197	42591198	0,192,0
chr10	42609102	42609103	GiM-5i(3)	3	-	42609102	42609103	255,0,0
chr10	42616199	42616200	GiM-20i(3)	3	-	42616199	42616200	255,0,0
chr10	42616485	42616486	GiM-2i(1)	1	+	42616485	42616486	0,192,0
chr10	42616567	42616568	GiM-5i(7)	7	+	42616567	42616568	0,192,0
chr10	42616669	42616670	GiM-15i(20)	20	-	42616669	42616670	255,0,0
chr10	42618789	42618790	GiM-2i(1)	1	-	42618789	42618790	255,0,0
chr10	42682622	42682623	GiM-27i(1)	1	+	42682622	42682623	0,192,0
chr10	42830514	42830515	GiM-22i(3)	3	+	42830514	42830515	0,192,0
chr10	42834917	42834918	GiM-10i(3)	3	-	42834917	42834918	255,0,0
chr10	42835464	42835465	GiM-12i(1)	1	+	42835464	42835465	0,192,0
chr10	42844777	42844778	GiM-6i(1)	1	-	42844777	42844778	255,0,0
chr10	43187561	43187562	GiM-20i(23)	23	+	43187561	43187562	0,192,0
chr10	43461254	43461255	GiM-27i(5)	5	+	43461254	43461255	0,192,0
chr10	43545125	43545126	GiM-21i(1)	1	+	43545125	43545126	0,192,0
chr10	43716558	43716559	GiM-22i(4)	4	+	43716558	43716559	0,192,0
chr10	44253384	44253385	GiM-3i(5)	5	-	44253384	44253385	255,0,0
chr10	44254605	44254606	GiM-3i(5)	5	+	44254605	44254606	0,192,0
chr10	44257373	44257374	GiM-13i(1)	1	+	44257373	44257374	0,192,0
chr10	44257380	44257381	GiM-3i(1)	1	+	44257380	44257381	0,192,0
chr10	44259464	44259465	GiM-3i(2)	2	+	44259464	44259465	0,192,0
chr10	44259989	44259990	GiM-3i(1)	1	-	44259989	44259990	255,0,0
chr10	44407144	44407145	GiM-3i(3)	3	+	44407144	44407145	0,192,0
chr10	44448416	44448417	GiM-16i(1)	1	-	44448416	44448417	255,0,0
chr10	44845810	44845811	GiM-8i(3)	3	-	44845810	44845811	255,0,0
chr10	44851164	44851165	GiM-4i(1)	1	+	44851164	44851165	0,192,0
chr10	45541941	45541942	GiM-18i(1)	1	+	45541941	45541942	0,192,0
chr10	45543401	45543402	GiM-27i(2)	2	+	45543401	45543402	0,192,0
chr10	53311182	53311183	GiM-13i(3)	3	+	53311182	53311183	0,192,0
chr10	53315878	53315879	GiM-26i(1)	1	+	53315878	53315879	0,192,0
chr10	53317038	53317039	GiM-12i(1)	1	+	53317038	53317039	0,192,0
chr10	53529037	53529038	GiM-6i(3)	3	-	53529037	53529038	255,0,0
chr10	53609681	53609682	GiM-14i(1)	1	-	53609681	53609682	255,0,0
chr10	53763450	53763451	GiM-6i(1)	1	-	53763450	53763451	255,0,0
chr10	53767278	53767279	GiM-3i(1)	1	+	53767278	53767279	0,192,0
chr10	53768275	53768276	GiM-9i(1)	1	+	53768275	53768276	0,192,0
chr10	57101389	57101390	GiM-16i(1)	1	+	57101389	57101390	0,192,0
chr10	57814627	57814628	GiM-17i(1)	1	+	57814627	57814628	0,192,0
chr10	57832560	57832561	GiM-2i(1)	1	-	57832560	57832561	255,0,0
chr10	57832621	57832622	GiM-21i(2)	2	+	57832621	57832622	0,192,0
chr10	59025042	59025043	GiM-6i(3)	3	-	59025042	59025043	255,0,0
chr10	59155276	59155277	GiM-7i(1)	1	+	59155276	59155277	0,192,0
chr10	59246799	59246800	GiM-1i(5)	5	+	59246799	59246800	0,192,0
chr10	59247219	59247220	GiM-22i(1)	1	-	59247219	59247220	255,0,0
chr10	59360128	59360129	GiM-23i(1)	1	+	59360128	59360129	0,192,0
chr10	59363012	59363013	GiM-26i(1)	1	+	59363012	59363013	0,192,0
chr10	59363157	59363158	GiM-12i(16)	16	-	59363157	59363158	255,0,0
chr10	59363427	59363428	GiM-13i(1)	1	+	59363427	59363428	0,192,0
chr10	59364071	59364072	GiM-6i(3)	3	-	59364071	59364072	255,0,0
chr10	59371244	59371245	GiM-22i(1)	1	+	59371244	59371245	0,192,0
chr10	59372559	59372560	GiM-8i(1)	1	+	59372559	59372560	0,192,0
chr10	59373126	59373127	GiM-2i(1)	1	-	59373126	59373127	255,0,0
chr10	59373162	59373163	GiM-24i(2)	2	-	59373162	59373163	255,0,0
chr10	59373288	59373289	GiM-20i(1)	1	-	59373288	59373289	255,0,0
chr10	59375584	59375585	GiM-20i(1)	1	-	59375584	59375585	255,0,0
chr10	59425455	59425456	GiM-5i(1)	1	+	59425455	59425456	0,192,0
chr10	59426639	59426640	GiM-17i(2)	2	-	59426639	59426640	255,0,0
chr10	59432753	59432754	GiM-3i(3)	3	-	59432753	59432754	255,0,0
chr10	59438714	59438715	GiM-22i(2)	2	-	59438714	59438715	255,0,0
chr10	59444840	59444841	GiM-7i(2)	2	-	59444840	59444841	255,0,0
chr10	59445043	59445044	GiM-23i(2)	2	+	59445043	59445044	0,192,0
chr10	59445062	59445063	GiM-8i(2)	2	+	59445062	59445063	0,192,0
chr10	59454220	59454221	GiM-18i(13)	13	-	59454220	59454221	255,0,0
chr10	59746811	59746812	GiM-9i(1)	1	+	59746811	59746812	0,192,0
chr10	59746855	59746856	GiM-15i(1)	1	+	59746855	59746856	0,192,0
chr10	59746950	59746951	GiM-17i(3)	3	-	59746950	59746951	255,0,0
chr10	59751424	59751425	GiM-16i(1)	1	-	59751424	59751425	255,0,0
chr10	59835063	59835064	GiM-17i(2)	2	+	59835063	59835064	0,192,0
chr10	59853367	59853368	GiM-5i(1)	1	-	59853367	59853368	255,0,0
chr10	59853715	59853716	GiM-13i(5)	5	+	59853715	59853716	0,192,0
chr10	60029710	60029711	GiM-10i(1)	1	-	60029710	60029711	255,0,0
chr10	60201756	60201757	GiM-10i(2)	2	-	60201756	60201757	255,0,0
chr10	60696755	60696756	GiM-1i(2)	2	+	60696755	60696756	0,192,0
chr10	60914805	60914806	GiM-11i(2)	2	-	60914805	60914806	255,0,0
chr10	61498669	61498670	GiM-24i(2)	2	-	61498669	61498670	255,0,0
chr10	61677048	61677049	GiM-6i(1)	1	+	61677048	61677049	0,192,0
chr10	61680813	61680814	GiM-13i(1)	1	+	61680813	61680814	0,192,0
chr10	61711208	61711209	GiM-21i(2)	2	+	61711208	61711209	0,192,0
chr10	61965943	61965944	GiM-4i(1)	1	-	61965943	61965944	255,0,0
chr10	62005800	62005801	GiM-8i(1)	1	+	62005800	62005801	0,192,0
chr10	62555796	62555797	GiM-28i(2)	2	+	62555796	62555797	0,192,0
chr10	66748357	66748358	GiM-24i(2)	2	+	66748357	66748358	0,192,0
chr10	67364623	67364624	GiM-24i(3)	3	-	67364623	67364624	255,0,0
chr10	67368138	67368139	GiM-9i(2)	2	-	67368138	67368139	255,0,0
chr10	67499509	67499510	GiM-19i(1)	1	-	67499509	67499510	255,0,0
chr10	67572433	67572434	GiM-20i(1)	1	+	67572433	67572434	0,192,0
chr10	67687154	67687155	GiM-14i(2)	2	-	67687154	67687155	255,0,0
chr10	68244983	68244984	GiM-2i(2)	2	+	68244983	68244984	0,192,0
chr10	68549479	68549480	GiM-21i(2)	2	-	68549479	68549480	255,0,0
chr10	68622013	68622014	GiM-23i(2)	2	+	68622013	68622014	0,192,0
chr10	68631022	68631023	GiM-27i(1)	1	-	68631022	68631023	255,0,0
chr10	69035051	69035052	GiM-7i(3)	3	-	69035051	69035052	255,0,0
chr10	69048161	69048162	GiM-22i(2)	2	-	69048161	69048162	255,0,0
chr10	69546630	69546631	GiM-6i(4)	4	+	69546630	69546631	0,192,0
chr10	69546933	69546934	GiM-3i(1)	1	-	69546933	69546934	255,0,0
chr10	70252622	70252623	GiM-19i(2)	2	+	70252622	70252623	0,192,0
chr10	70286451	70286452	GiM-10i(6)	6	+	70286451	70286452	0,192,0
chr10	70329695	70329696	GiM-27i(1)	1	-	70329695	70329696	255,0,0
chr10	70335901	70335902	GiM-13i(1)	1	+	70335901	70335902	0,192,0
chr10	70566282	70566283	GiM-27i(3)	3	+	70566282	70566283	0,192,0
chr10	70566381	70566382	GiM-16i(3)	3	-	70566381	70566382	255,0,0
chr10	70570162	70570163	GiM-26i(1)	1	-	70570162	70570163	255,0,0
chr10	70572424	70572425	GiM-3i(1)	1	+	70572424	70572425	0,192,0
chr10	70573286	70573287	GiM-21i(1)	1	+	70573286	70573287	0,192,0
chr10	70577218	70577219	GiM-11i(2)	2	+	70577218	70577219	0,192,0
chr10	70591260	70591261	GiM-8i(1)	1	-	70591260	70591261	255,0,0
chr10	70681575	70681576	GiM-28i(2)	2	-	70681575	70681576	255,0,0
chr10	70684403	70684404	GiM-2i(1)	1	+	70684403	70684404	0,192,0
chr10	70747801	70747802	GiM-28i(2)	2	+	70747801	70747802	0,192,0
chr10	70807873	70807874	GiM-21i(1)	1	-	70807873	70807874	255,0,0
chr10	70809195	70809196	GiM-25i(1)	1	-	70809195	70809196	255,0,0
chr10	75034359	75034360	GiM-5i(1)	1	+	75034359	75034360	0,192,0
chr10	75322671	75322672	GiM-10i(1)	1	-	75322671	75322672	255,0,0
chr10	76146075	76146076	GiM-13i(4)	4	+	76146075	76146076	0,192,0
chr10	76307766	76307767	GiM-11i(1)	1	-	76307766	76307767	255,0,0
chr10	76308810	76308811	GiM-17i(4)	4	+	76308810	76308811	0,192,0
chr10	76368122	76368123	GiM-26i(1)	1	+	76368122	76368123	0,192,0
chr10	76371221	76371222	GiM-9i(1)	1	+	76371221	76371222	0,192,0
chr10	76701514	76701515	GiM-19i(2)	2	-	76701514	76701515	255,0,0
chr10	76978833	76978834	GiM-12i(4)	4	-	76978833	76978834	255,0,0
chr10	76983701	76983702	GiM-28i(1)	1	+	76983701	76983702	0,192,0
chr10	76993986	76993987	GiM-12i(1)	1	-	76993986	76993987	255,0,0
chr10	76999796	76999797	GiM-28i(1)	1	+	76999796	76999797	0,192,0
chr10	77002259	77002260	GiM-2i(1)	1	+	77002259	77002260	0,192,0
chr10	77017318	77017319	GiM-28i(1)	1	+	77017318	77017319	0,192,0
chr10	77143282	77143283	GiM-12i(1)	1	+	77143282	77143283	0,192,0
chr10	77579902	77579903	GiM-22i(2)	2	+	77579902	77579903	0,192,0
chr10	77582971	77582972	GiM-9i(1)	1	+	77582971	77582972	0,192,0
chr10	77596998	77596999	GiM-24i(1)	1	+	77596998	77596999	0,192,0
chr10	77814103	77814104	GiM-15i(8)	8	+	77814103	77814104	0,192,0
chr10	77815696	77815697	GiM-23i(6)	6	+	77815696	77815697	0,192,0
chr10	77888266	77888267	GiM-10i(1)	1	+	77888266	77888267	0,192,0
chr10	77927971	77927972	GiM-1i(1)	1	+	77927971	77927972	0,192,0
chr10	78036528	78036529	GiM-16i(1)	1	-	78036528	78036529	255,0,0
chr10	78040114	78040115	GiM-7i(1)	1	-	78040114	78040115	255,0,0
chr10	78040739	78040740	GiM-7i(4)	4	-	78040739	78040740	255,0,0
chr10	78041570	78041571	GiM-25i(2)	2	-	78041570	78041571	255,0,0
chr10	78055244	78055245	GiM-28i(2)	2	-	78055244	78055245	255,0,0
chr10	78055432	78055433	GiM-13i(5)	5	+	78055432	78055433	0,192,0
chr10	78055606	78055607	GiM-16i(2)	2	+	78055606	78055607	0,192,0
chr10	78055788	78055789	GiM-5i(1)	1	+	78055788	78055789	0,192,0
chr10	78056637	78056638	GiM-9i(1)	1	+	78056637	78056638	0,192,0
chr10	79227181	79227182	GiM-16i(4)	4	-	79227181	79227182	255,0,0
chr10	79244293	79244294	GiM-11i(1)	1	+	79244293	79244294	0,192,0
chr10	79390703	79390704	GiM-18i(1)	1	-	79390703	79390704	255,0,0
chr10	79457431	79457432	GiM-19i(2)	2	+	79457431	79457432	0,192,0
chr10	79458247	79458248	GiM-1i(1)	1	+	79458247	79458248	0,192,0
chr10	79615807	79615808	GiM-23i(1)	1	+	79615807	79615808	0,192,0
chr10	79622081	79622082	GiM-15i(1)	1	-	79622081	79622082	255,0,0
chr10	79623969	79623970	GiM-15i(4)	4	+	79623969	79623970	0,192,0
chr10	79625231	79625232	GiM-14i(1)	1	+	79625231	79625232	0,192,0
chr10	79629256	79629257	GiM-19i(3)	3	-	79629256	79629257	255,0,0
chr10	79629339	79629340	GiM-5i(4)	4	+	79629339	79629340	0,192,0
chr10	79629453	79629454	GiM-10i(2)	2	+	79629453	79629454	0,192,0
chr10	79665278	79665279	GiM-19i(1)	1	+	79665278	79665279	0,192,0
chr10	79725117	79725118	GiM-24i(1)	1	+	79725117	79725118	0,192,0
chr10	79728310	79728311	GiM-18i(1)	1	+	79728310	79728311	0,192,0
chr10	79861179	79861180	GiM-18i(2)	2	-	79861179	79861180	255,0,0
chr10	79861404	79861405	GiM-15i(4)	4	-	79861404	79861405	255,0,0
chr10	79861404	79861405	GiM-7i(2)	2	-	79861404	79861405	255,0,0
chr10	79863149	79863150	GiM-27i(2)	2	-	79863149	79863150	255,0,0
chr10	79863180	79863181	GiM-26i(3)	3	-	79863180	79863181	255,0,0
chr10	79863358	79863359	GiM-8i(5)	5	+	79863358	79863359	0,192,0
chr10	79863368	79863369	GiM-16i(2)	2	+	79863368	79863369	0,192,0
chr10	79895536	79895537	GiM-13i(4)	4	-	79895536	79895537	255,0,0
chr10	80035139	80035140	GiM-15i(3)	3	-	80035139	80035140	255,0,0
chr10	80065386	80065387	GiM-7i(1)	1	+	80065386	80065387	0,192,0
chr10	80068228	80068229	GiM-26i(5)	5	-	80068228	80068229	255,0,0
chr10	80121052	80121053	GiM-11i(3)	3	-	80121052	80121053	255,0,0
chr10	80121095	80121096	GiM-20i(6)	6	-	80121095	80121096	255,0,0
chr10	80121239	80121240	GiM-26i(6)	6	+	80121239	80121240	0,192,0
chr10	80140446	80140447	GiM-28i(1)	1	-	80140446	80140447	255,0,0
chr10	80140467	80140468	GiM-17i(5)	5	-	80140467	80140468	255,0,0
chr10	80155659	80155660	GiM-18i(10)	10	+	80155659	80155660	0,192,0
chr10	80158578	80158579	GiM-28i(3)	3	+	80158578	80158579	0,192,0
chr10	80158705	80158706	GiM-6i(2)	2	-	80158705	80158706	255,0,0
chr10	80158846	80158847	GiM-26i(2)	2	-	80158846	80158847	255,0,0
chr10	80160561	80160562	GiM-13i(1)	1	-	80160561	80160562	255,0,0
chr10	80161717	80161718	GiM-9i(1)	1	+	80161717	80161718	0,192,0
chr10	80162658	80162659	GiM-24i(1)	1	-	80162658	80162659	255,0,0
chr10	80164321	80164322	GiM-16i(2)	2	+	80164321	80164322	0,192,0
chr10	80259863	80259864	GiM-20i(3)	3	-	80259863	80259864	255,0,0
chr10	80363322	80363323	GiM-20i(1)	1	+	80363322	80363323	0,192,0
chr10	80391890	80391891	GiM-21i(3)	3	+	80391890	80391891	0,192,0
chr10	80392174	80392175	GiM-7i(1)	1	+	80392174	80392175	0,192,0
chr10	80392319	80392320	GiM-9i(12)	12	-	80392319	80392320	255,0,0
chr10	80431309	80431310	GiM-28i(2)	2	-	80431309	80431310	255,0,0
chr10	80636390	80636391	GiM-7i(3)	3	+	80636390	80636391	0,192,0
chr10	80637499	80637500	GiM-28i(1)	1	-	80637499	80637500	255,0,0
chr10	80657585	80657586	GiM-16i(2)	2	+	80657585	80657586	0,192,0
chr10	80707667	80707668	GiM-22i(2)	2	-	80707667	80707668	255,0,0
chr10	80711208	80711209	GiM-7i(3)	3	+	80711208	80711209	0,192,0
chr10	80711228	80711229	GiM-28i(3)	3	+	80711228	80711229	0,192,0
chr10	80711592	80711593	GiM-18i(2)	2	-	80711592	80711593	255,0,0
chr10	80714143	80714144	GiM-11i(1)	1	-	80714143	80714144	255,0,0
chr10	80792086	80792087	GiM-15i(14)	14	+	80792086	80792087	0,192,0
chr10	80793234	80793235	GiM-17i(1)	1	+	80793234	80793235	0,192,0
chr10	80814310	80814311	GiM-19i(2)	2	+	80814310	80814311	0,192,0
chr10	80814335	80814336	GiM-11i(4)	4	+	80814335	80814336	0,192,0
chr10	80814823	80814824	GiM-3i(5)	5	+	80814823	80814824	0,192,0
chr10	80814997	80814998	GiM-8i(1)	1	-	80814997	80814998	255,0,0
chr10	80819224	80819225	GiM-8i(4)	4	-	80819224	80819225	255,0,0
chr10	80865220	80865221	GiM-2i(1)	1	-	80865220	80865221	255,0,0
chr10	80958782	80958783	GiM-15i(6)	6	-	80958782	80958783	255,0,0
chr10	80958793	80958794	GiM-2i(1)	1	-	80958793	80958794	255,0,0
chr10	80959604	80959605	GiM-13i(1)	1	+	80959604	80959605	0,192,0
chr10	80959908	80959909	GiM-6i(1)	1	-	80959908	80959909	255,0,0
chr10	80960960	80960961	GiM-28i(1)	1	+	80960960	80960961	0,192,0
chr10	80961656	80961657	GiM-13i(1)	1	-	80961656	80961657	255,0,0
chr10	80962755	80962756	GiM-13i(1)	1	-	80962755	80962756	255,0,0
chr10	80962795	80962796	GiM-24i(1)	1	-	80962795	80962796	255,0,0
chr10	80974359	80974360	GiM-13i(3)	3	-	80974359	80974360	255,0,0
chr10	81021907	81021908	GiM-26i(3)	3	-	81021907	81021908	255,0,0
chr10	81024401	81024402	GiM-8i(1)	1	+	81024401	81024402	0,192,0
chr10	81034088	81034089	GiM-20i(3)	3	-	81034088	81034089	255,0,0
chr10	81035509	81035510	GiM-15i(8)	8	-	81035509	81035510	255,0,0
chr10	81064869	81064870	GiM-17i(3)	3	+	81064869	81064870	0,192,0
chr10	81069568	81069569	GiM-3i(5)	5	+	81069568	81069569	0,192,0
chr10	81107387	81107388	GiM-13i(3)	3	+	81107387	81107388	0,192,0
chr10	82160726	82160727	GiM-28i(1)	1	-	82160726	82160727	255,0,0
chr10	82225519	82225520	GiM-27i(1)	1	-	82225519	82225520	255,0,0
chr10	82301962	82301963	GiM-5i(1)	1	+	82301962	82301963	0,192,0
chr10	83173596	83173597	GiM-23i(1)	1	-	83173596	83173597	255,0,0
chr10	83180760	83180761	GiM-13i(1)	1	+	83180760	83180761	0,192,0
chr10	83181084	83181085	GiM-17i(2)	2	-	83181084	83181085	255,0,0
chr10	83496357	83496358	GiM-13i(1)	1	-	83496357	83496358	255,0,0
chr10	84109631	84109632	GiM-14i(3)	3	+	84109631	84109632	0,192,0
chr10	84623791	84623792	GiM-23i(3)	3	-	84623791	84623792	255,0,0
chr10	84648570	84648571	GiM-3i(3)	3	-	84648570	84648571	255,0,0
chr10	86169642	86169643	GiM-13i(3)	3	+	86169642	86169643	0,192,0
chr10	86191598	86191599	GiM-22i(1)	1	+	86191598	86191599	0,192,0
chr10	86522840	86522841	GiM-20i(4)	4	+	86522840	86522841	0,192,0
chr10	86563454	86563455	GiM-1i(1)	1	+	86563454	86563455	0,192,0
chr10	86585074	86585075	GiM-13i(1)	1	+	86585074	86585075	0,192,0
chr10	87665481	87665482	GiM-7i(1)	1	-	87665481	87665482	255,0,0
chr10	87868252	87868253	GiM-5i(1)	1	+	87868252	87868253	0,192,0
chr10	88884343	88884344	GiM-23i(1)	1	+	88884343	88884344	0,192,0
chr10	88905744	88905745	GiM-13i(2)	2	-	88905744	88905745	255,0,0
chr10	89172356	89172357	GiM-26i(3)	3	+	89172356	89172357	0,192,0
chr10	90151977	90151978	GiM-6i(1)	1	+	90151977	90151978	0,192,0
chr10	92561030	92561031	GiM-11i(2)	2	-	92561030	92561031	255,0,0
chr10	92585243	92585244	GiM-14i(2)	2	+	92585243	92585244	0,192,0
chr10	92585866	92585867	GiM-11i(1)	1	+	92585866	92585867	0,192,0
chr10	92606963	92606964	GiM-2i(1)	1	+	92606963	92606964	0,192,0
chr10	92608245	92608246	GiM-11i(2)	2	-	92608245	92608246	255,0,0
chr10	92608514	92608515	GiM-2i(1)	1	+	92608514	92608515	0,192,0
chr10	92628555	92628556	GiM-23i(3)	3	+	92628555	92628556	0,192,0
chr10	92628755	92628756	GiM-4i(3)	3	-	92628755	92628756	255,0,0
chr10	92629351	92629352	GiM-21i(4)	4	-	92629351	92629352	255,0,0
chr10	92630427	92630428	GiM-20i(1)	1	-	92630427	92630428	255,0,0
chr10	92738695	92738696	GiM-20i(1)	1	+	92738695	92738696	0,192,0
chr10	92773562	92773563	GiM-3i(1)	1	+	92773562	92773563	0,192,0
chr10	92904329	92904330	GiM-11i(6)	6	-	92904329	92904330	255,0,0
chr10	93274019	93274020	GiM-18i(1)	1	+	93274019	93274020	0,192,0
chr10	93292405	93292406	GiM-13i(3)	3	-	93292405	93292406	255,0,0
chr10	93294952	93294953	GiM-26i(4)	4	+	93294952	93294953	0,192,0
chr10	93295091	93295092	GiM-4i(4)	4	+	93295091	93295092	0,192,0
chr10	93370336	93370337	GiM-2i(3)	3	-	93370336	93370337	255,0,0
chr10	93377726	93377727	GiM-14i(1)	1	-	93377726	93377727	255,0,0
chr10	93400935	93400936	GiM-10i(2)	2	+	93400935	93400936	0,192,0
chr10	93402279	93402280	GiM-21i(2)	2	+	93402279	93402280	0,192,0
chr10	93405253	93405254	GiM-14i(3)	3	+	93405253	93405254	0,192,0
chr10	93794657	93794658	GiM-28i(2)	2	+	93794657	93794658	0,192,0
chr10	93898601	93898602	GiM-8i(3)	3	-	93898601	93898602	255,0,0
chr10	94575746	94575747	GiM-2i(1)	1	-	94575746	94575747	255,0,0
chr10	95679706	95679707	GiM-6i(2)	2	-	95679706	95679707	255,0,0
chr10	95805666	95805667	GiM-8i(1)	1	+	95805666	95805667	0,192,0
chr10	96188222	96188223	GiM-9i(4)	4	+	96188222	96188223	0,192,0
chr10	96300761	96300762	GiM-16i(1)	1	+	96300761	96300762	0,192,0
chr10	98376107	98376108	GiM-13i(4)	4	-	98376107	98376108	255,0,0
chr10	98577780	98577781	GiM-13i(2)	2	-	98577780	98577781	255,0,0
chr10	98577785	98577786	GiM-8i(2)	2	-	98577785	98577786	255,0,0
chr10	98578408	98578409	GiM-18i(56)	56	-	98578408	98578409	255,0,0
chr10	98582226	98582227	GiM-12i(5)	5	+	98582226	98582227	0,192,0
chr10	98582812	98582813	GiM-8i(2)	2	-	98582812	98582813	255,0,0
chr10	98589939	98589940	GiM-22i(2)	2	+	98589939	98589940	0,192,0
chr10	98726033	98726034	GiM-25i(6)	6	-	98726033	98726034	255,0,0
chr10	109727169	109727170	GiM-15i(1)	1	-	109727169	109727170	255,0,0
chr10	110183581	110183582	GiM-7i(1)	1	+	110183581	110183582	0,192,0
chr10	110434807	110434808	GiM-9i(1)	1	-	110434807	110434808	255,0,0
chr10	110469363	110469364	GiM-17i(1)	1	+	110469363	110469364	0,192,0
chr10	110507558	110507559	GiM-20i(1)	1	+	110507558	110507559	0,192,0
chr10	110521743	110521744	GiM-20i(2)	2	-	110521743	110521744	255,0,0
chr10	110522067	110522068	GiM-5i(1)	1	+	110522067	110522068	0,192,0
chr10	110593636	110593637	GiM-6i(3)	3	+	110593636	110593637	0,192,0
chr10	110605557	110605558	GiM-7i(3)	3	-	110605557	110605558	255,0,0
chr10	110914473	110914474	GiM-25i(5)	5	-	110914473	110914474	255,0,0
chr10	110996217	110996218	GiM-6i(3)	3	-	110996217	110996218	255,0,0
chr10	111296279	111296280	GiM-6i(1)	1	+	111296279	111296280	0,192,0
chr10	114489919	114489920	GiM-21i(13)	13	-	114489919	114489920	255,0,0
chr10	114752864	114752865	GiM-10i(1)	1	-	114752864	114752865	255,0,0
chr10	114763967	114763968	GiM-5i(1)	1	-	114763967	114763968	255,0,0
chr10	115991623	115991624	GiM-1i(2)	2	+	115991623	115991624	0,192,0
chr10	115995260	115995261	GiM-22i(2)	2	-	115995260	115995261	255,0,0
chr10	115995753	115995754	GiM-27i(1)	1	-	115995753	115995754	255,0,0
chr10	115996714	115996715	GiM-26i(4)	4	-	115996714	115996715	255,0,0
chr10	116101747	116101748	GiM-20i(1)	1	+	116101747	116101748	0,192,0
chr10	116102104	116102105	GiM-3i(13)	13	-	116102104	116102105	255,0,0
chr10	116353795	116353796	GiM-9i(3)	3	+	116353795	116353796	0,192,0
chr10	116542398	116542399	GiM-25i(1)	1	-	116542398	116542399	255,0,0
chr10	116548573	116548574	GiM-27i(1)	1	+	116548573	116548574	0,192,0
chr10	116872251	116872252	GiM-21i(6)	6	+	116872251	116872252	0,192,0
chr10	117235591	117235592	GiM-14i(2)	2	+	117235591	117235592	0,192,0
chr10	117241651	117241652	GiM-13i(1)	1	-	117241651	117241652	255,0,0
chr10	117296679	117296680	GiM-10i(1)	1	+	117296679	117296680	0,192,0
chr10	117298468	117298469	GiM-14i(3)	3	+	117298468	117298469	0,192,0
chr10	117355236	117355237	GiM-20i(5)	5	+	117355236	117355237	0,192,0
chr10	117384866	117384867	GiM-13i(1)	1	-	117384866	117384867	255,0,0
chr10	117388640	117388641	GiM-17i(2)	2	+	117388640	117388641	0,192,0
chr10	117389421	117389422	GiM-13i(1)	1	-	117389421	117389422	255,0,0
chr10	117440133	117440134	GiM-10i(1)	1	-	117440133	117440134	255,0,0
chr10	117443968	117443969	GiM-1i(3)	3	+	117443968	117443969	0,192,0
chr10	117520371	117520372	GiM-26i(2)	2	+	117520371	117520372	0,192,0
chr10	117521466	117521467	GiM-19i(1)	1	-	117521466	117521467	255,0,0
chr10	117521551	117521552	GiM-24i(5)	5	-	117521551	117521552	255,0,0
chr10	117521605	117521606	GiM-6i(1)	1	-	117521605	117521606	255,0,0
chr10	117531162	117531163	GiM-24i(2)	2	+	117531162	117531163	0,192,0
chr10	117538428	117538429	GiM-16i(2)	2	-	117538428	117538429	255,0,0
chr10	117622270	117622271	GiM-16i(1)	1	+	117622270	117622271	0,192,0
chr10	117645956	117645957	GiM-22i(2)	2	+	117645956	117645957	0,192,0
chr10	117655261	117655262	GiM-22i(12)	12	+	117655261	117655262	0,192,0
chr10	117727406	117727407	GiM-8i(1)	1	-	117727406	117727407	255,0,0
chr10	117729623	117729624	GiM-23i(2)	2	+	117729623	117729624	0,192,0
chr10	118069603	118069604	GiM-18i(1)	1	-	118069603	118069604	255,0,0
chr10	118318994	118318995	GiM-7i(2)	2	+	118318994	118318995	0,192,0
chr10	118447330	118447331	GiM-8i(3)	3	-	118447330	118447331	255,0,0
chr10	118447813	118447814	GiM-28i(2)	2	+	118447813	118447814	0,192,0
chr10	118449130	118449131	GiM-14i(4)	4	+	118449130	118449131	0,192,0
chr10	118629975	118629976	GiM-9i(3)	3	-	118629975	118629976	255,0,0
chr10	118731576	118731577	GiM-19i(1)	1	+	118731576	118731577	0,192,0
chr10	120111419	120111420	GiM-7i(3)	3	+	120111419	120111420	0,192,0
chr10	120218651	120218652	GiM-2i(4)	4	-	120218651	120218652	255,0,0
chr10	120896894	120896895	GiM-20i(3)	3	+	120896894	120896895	0,192,0
chr10	120942996	120942997	GiM-25i(3)	3	+	120942996	120942997	0,192,0
chr10	120943317	120943318	GiM-12i(2)	2	-	120943317	120943318	255,0,0
chr10	121033677	121033678	GiM-9i(1)	1	+	121033677	121033678	0,192,0
chr10	121681096	121681097	GiM-26i(4)	4	-	121681096	121681097	255,0,0
chr10	122088416	122088417	GiM-11i(1)	1	-	122088416	122088417	255,0,0
chr10	122089473	122089474	GiM-12i(3)	3	-	122089473	122089474	255,0,0
chr10	122089506	122089507	GiM-5i(1)	1	-	122089506	122089507	255,0,0
chr10	122089733	122089734	GiM-10i(5)	5	-	122089733	122089734	255,0,0
chr10	122089938	122089939	GiM-25i(4)	4	+	122089938	122089939	0,192,0
chr10	122127544	122127545	GiM-1i(5)	5	-	122127544	122127545	255,0,0
chr10	122159543	122159544	GiM-21i(2)	2	-	122159543	122159544	255,0,0
chr10	122196292	122196293	GiM-24i(2)	2	-	122196292	122196293	255,0,0
chr10	122196914	122196915	GiM-28i(2)	2	-	122196914	122196915	255,0,0
chr10	122198293	122198294	GiM-21i(4)	4	+	122198293	122198294	0,192,0
chr10	122238491	122238492	GiM-11i(2)	2	+	122238491	122238492	0,192,0
chr10	122421912	122421913	GiM-5i(1)	1	+	122421912	122421913	0,192,0
chr10	122422696	122422697	GiM-20i(3)	3	-	122422696	122422697	255,0,0
chr10	123882052	123882053	GiM-23i(2)	2	+	123882052	123882053	0,192,0
chr10	124783693	124783694	GiM-21i(1)	1	+	124783693	124783694	0,192,0
chr10	126478602	126478603	GiM-5i(1)	1	-	126478602	126478603	255,0,0
chr10	126501207	126501208	GiM-19i(2)	2	-	126501207	126501208	255,0,0
chr10	126501487	126501488	GiM-13i(1)	1	-	126501487	126501488	255,0,0
chr10	126512931	126512932	GiM-23i(1)	1	+	126512931	126512932	0,192,0
chr10	126548031	126548032	GiM-23i(1)	1	-	126548031	126548032	255,0,0
chr10	126572068	126572069	GiM-13i(5)	5	-	126572068	126572069	255,0,0
chr10	126572752	126572753	GiM-12i(1)	1	+	126572752	126572753	0,192,0
chr10	126595480	126595481	GiM-10i(1)	1	-	126595480	126595481	255,0,0
chr10	126631879	126631880	GiM-6i(1)	1	-	126631879	126631880	255,0,0
chr10	126727214	126727215	GiM-21i(8)	8	-	126727214	126727215	255,0,0
chr10	126728470	126728471	GiM-9i(1)	1	-	126728470	126728471	255,0,0
chr10	126748287	126748288	GiM-13i(3)	3	+	126748287	126748288	0,192,0
chr10	126760858	126760859	GiM-27i(2)	2	+	126760858	126760859	0,192,0
chr10	126797401	126797402	GiM-13i(5)	5	-	126797401	126797402	255,0,0
chr10	127105673	127105674	GiM-15i(2)	2	+	127105673	127105674	0,192,0
chr10	127441648	127441649	GiM-16i(6)	6	+	127441648	127441649	0,192,0
chr10	127473229	127473230	GiM-9i(2)	2	+	127473229	127473230	0,192,0
chr10	127531407	127531408	GiM-27i(1)	1	+	127531407	127531408	0,192,0
chr10	127532571	127532572	GiM-14i(2)	2	+	127532571	127532572	0,192,0
chr10	127667362	127667363	GiM-8i(4)	4	+	127667362	127667363	0,192,0
chr10	127668642	127668643	GiM-2i(1)	1	-	127668642	127668643	255,0,0
chr10	127760122	127760123	GiM-3i(1)	1	+	127760122	127760123	0,192,0
chr10	127760521	127760522	GiM-9i(3)	3	+	127760521	127760522	0,192,0
chr10	127807848	127807849	GiM-1i(1)	1	+	127807848	127807849	0,192,0
chr10	127892378	127892379	GiM-15i(2)	2	-	127892378	127892379	255,0,0
chr10	127932056	127932057	GiM-15i(4)	4	-	127932056	127932057	255,0,0
chr10	127962292	127962293	GiM-20i(1)	1	+	127962292	127962293	0,192,0
chr10	128062708	128062709	GiM-27i(3)	3	+	128062708	128062709	0,192,0
chr10	128132776	128132777	GiM-28i(1)	1	+	128132776	128132777	0,192,0
chr10	128143749	128143750	GiM-5i(1)	1	-	128143749	128143750	255,0,0
chr10	128148274	128148275	GiM-1i(1)	1	-	128148274	128148275	255,0,0
chr10	128148352	128148353	GiM-15i(2)	2	+	128148352	128148353	0,192,0
chr10	128148977	128148978	GiM-12i(2)	2	+	128148977	128148978	0,192,0
chr10	128179036	128179037	GiM-1i(10)	10	+	128179036	128179037	0,192,0
chr10	128182416	128182417	GiM-14i(2)	2	-	128182416	128182417	255,0,0
chr10	128182510	128182511	GiM-15i(2)	2	+	128182510	128182511	0,192,0
chr10	128182569	128182570	GiM-24i(2)	2	-	128182569	128182570	255,0,0
chr10	128182608	128182609	GiM-1i(2)	2	-	128182608	128182609	255,0,0
chr10	128182730	128182731	GiM-26i(2)	2	+	128182730	128182731	0,192,0
chr10	128182860	128182861	GiM-26i(2)	2	+	128182860	128182861	0,192,0
chr10	128182871	128182872	GiM-20i(1)	1	+	128182871	128182872	0,192,0
chr10	128184881	128184882	GiM-15i(1)	1	+	128184881	128184882	0,192,0
chr10	128339194	128339195	GiM-3i(2)	2	-	128339194	128339195	255,0,0
chr10	128398913	128398914	GiM-12i(2)	2	-	128398913	128398914	255,0,0
chr10	128429159	128429160	GiM-11i(6)	6	+	128429159	128429160	0,192,0
chr10	128448189	128448190	GiM-16i(3)	3	+	128448189	128448190	0,192,0
chr10	129773263	129773264	GiM-18i(3)	3	+	129773263	129773264	0,192,0
chr10	129773948	129773949	GiM-25i(5)	5	-	129773948	129773949	255,0,0
chr10	129872425	129872426	GiM-21i(1)	1	-	129872425	129872426	255,0,0
chr10	129978322	129978323	GiM-3i(11)	11	+	129978322	129978323	0,192,0
chr11	3059869	3059870	GiM-26i(1)	1	-	3059869	3059870	255,0,0
chr11	3092073	3092074	GiM-4i(3)	3	+	3092073	3092074	0,192,0
chr11	3101344	3101345	GiM-19i(2)	2	+	3101344	3101345	0,192,0
chr11	3101568	3101569	GiM-5i(1)	1	+	3101568	3101569	0,192,0
chr11	3211011	3211012	GiM-16i(11)	11	-	3211011	3211012	255,0,0
chr11	3211156	3211157	GiM-7i(1)	1	-	3211156	3211157	255,0,0
chr11	3231443	3231444	GiM-2i(2)	2	-	3231443	3231444	255,0,0
chr11	3231590	3231591	GiM-3i(4)	4	+	3231590	3231591	0,192,0
chr11	3235757	3235758	GiM-22i(51)	51	+	3235757	3235758	0,192,0
chr11	3237964	3237965	GiM-24i(2)	2	+	3237964	3237965	0,192,0
chr11	3764065	3764066	GiM-28i(1)	1	-	3764065	3764066	255,0,0
chr11	4322930	4322931	GiM-23i(2)	2	+	4322930	4322931	0,192,0
chr11	4771627	4771628	GiM-26i(7)	7	-	4771627	4771628	255,0,0
chr11	4772834	4772835	GiM-21i(6)	6	+	4772834	4772835	0,192,0
chr11	4772913	4772914	GiM-17i(27)	27	+	4772913	4772914	0,192,0
chr11	4773041	4773042	GiM-22i(2)	2	-	4773041	4773042	255,0,0
chr11	4773085	4773086	GiM-8i(4)	4	-	4773085	4773086	255,0,0
chr11	5076480	5076481	GiM-10i(2)	2	+	5076480	5076481	0,192,0
chr11	5077107	5077108	GiM-5i(1)	1	+	5077107	5077108	0,192,0
chr11	5081417	5081418	GiM-9i(1)	1	-	5081417	5081418	255,0,0
chr11	5114922	5114923	GiM-23i(1)	1	+	5114922	5114923	0,192,0
chr11	5116461	5116462	GiM-13i(4)	4	-	5116461	5116462	255,0,0
chr11	5116510	5116511	GiM-20i(8)	8	+	5116510	5116511	0,192,0
chr11	5148882	5148883	GiM-15i(1)	1	-	5148882	5148883	255,0,0
chr11	5152565	5152566	GiM-5i(1)	1	-	5152565	5152566	255,0,0
chr11	5153571	5153572	GiM-7i(3)	3	+	5153571	5153572	0,192,0
chr11	5154497	5154498	GiM-16i(1)	1	-	5154497	5154498	255,0,0
chr11	5154509	5154510	GiM-8i(1)	1	-	5154509	5154510	255,0,0
chr11	5154561	5154562	GiM-2i(3)	3	+	5154561	5154562	0,192,0
chr11	5154915	5154916	GiM-28i(1)	1	+	5154915	5154916	0,192,0
chr11	5155236	5155237	GiM-14i(1)	1	-	5155236	5155237	255,0,0
chr11	5749343	5749344	GiM-28i(2)	2	+	5749343	5749344	0,192,0
chr11	5901299	5901300	GiM-16i(2)	2	+	5901299	5901300	0,192,0
chr11	6052569	6052570	GiM-14i(2)	2	+	6052569	6052570	0,192,0
chr11	6053781	6053782	GiM-7i(1)	1	+	6053781	6053782	0,192,0
chr11	6055253	6055254	GiM-17i(2)	2	-	6055253	6055254	255,0,0
chr11	6168082	6168083	GiM-28i(4)	4	-	6168082	6168083	255,0,0
chr11	6315084	6315085	GiM-26i(1)	1	-	6315084	6315085	255,0,0
chr11	6315234	6315235	GiM-17i(5)	5	-	6315234	6315235	255,0,0
chr11	6315242	6315243	GiM-13i(3)	3	-	6315242	6315243	255,0,0
chr11	6315242	6315243	GiM-18i(2)	2	-	6315242	6315243	255,0,0
chr11	6345213	6345214	GiM-4i(6)	6	-	6345213	6345214	255,0,0
chr11	6420802	6420803	GiM-5i(14)	14	-	6420802	6420803	255,0,0
chr11	6426656	6426657	GiM-3i(1)	1	+	6426656	6426657	0,192,0
chr11	6448656	6448657	GiM-3i(2)	2	-	6448656	6448657	255,0,0
chr11	6458015	6458016	GiM-13i(1)	1	-	6458015	6458016	255,0,0
chr11	6458434	6458435	GiM-5i(1)	1	+	6458434	6458435	0,192,0
chr11	6459652	6459653	GiM-21i(1)	1	+	6459652	6459653	0,192,0
chr11	6460316	6460317	GiM-13i(1)	1	+	6460316	6460317	0,192,0
chr11	6584588	6584589	GiM-27i(1)	1	-	6584588	6584589	255,0,0
chr11	6595463	6595464	GiM-9i(2)	2	-	6595463	6595464	255,0,0
chr11	6604038	6604039	GiM-28i(5)	5	+	6604038	6604039	0,192,0
chr11	6610894	6610895	GiM-10i(1)	1	-	6610894	6610895	255,0,0
chr11	6624249	6624250	GiM-11i(4)	4	-	6624249	6624250	255,0,0
chr11	6625850	6625851	GiM-18i(6)	6	+	6625850	6625851	0,192,0
chr11	6627300	6627301	GiM-28i(1)	1	+	6627300	6627301	0,192,0
chr11	7049453	7049454	GiM-11i(1)	1	+	7049453	7049454	0,192,0
chr11	7909639	7909640	GiM-27i(1)	1	+	7909639	7909640	0,192,0
chr11	8488997	8488998	GiM-23i(2)	2	-	8488997	8488998	255,0,0
chr11	8601402	8601403	GiM-2i(4)	4	-	8601402	8601403	255,0,0
chr11	8695856	8695857	GiM-13i(1)	1	+	8695856	8695857	0,192,0
chr11	11421374	11421375	GiM-24i(1)	1	-	11421374	11421375	255,0,0
chr11	11464937	11464938	GiM-22i(1)	1	+	11464937	11464938	0,192,0
chr11	11468955	11468956	GiM-9i(1)	1	+	11468955	11468956	0,192,0
chr11	11588345	11588346	GiM-14i(2)	2	-	11588345	11588346	255,0,0
chr11	11590698	11590699	GiM-2i(5)	5	-	11590698	11590699	255,0,0
chr11	11590833	11590834	GiM-16i(1)	1	-	11590833	11590834	255,0,0
chr11	11592659	11592660	GiM-20i(1)	1	+	11592659	11592660	0,192,0
chr11	11593268	11593269	GiM-19i(1)	1	-	11593268	11593269	255,0,0
chr11	11594996	11594997	GiM-9i(1)	1	+	11594996	11594997	0,192,0
chr11	11611054	11611055	GiM-15i(4)	4	-	11611054	11611055	255,0,0
chr11	11615908	11615909	GiM-6i(2)	2	-	11615908	11615909	255,0,0
chr11	11617074	11617075	GiM-15i(1)	1	-	11617074	11617075	255,0,0
chr11	11617233	11617234	GiM-17i(1)	1	-	11617233	11617234	255,0,0
chr11	11624767	11624768	GiM-18i(1)	1	-	11624767	11624768	255,0,0
chr11	11625251	11625252	GiM-3i(2)	2	+	11625251	11625252	0,192,0
chr11	11626576	11626577	GiM-13i(2)	2	+	11626576	11626577	0,192,0
chr11	11727038	11727039	GiM-13i(1)	1	+	11727038	11727039	0,192,0
chr11	11730598	11730599	GiM-13i(1)	1	+	11730598	11730599	0,192,0
chr11	11731224	11731225	GiM-23i(5)	5	-	11731224	11731225	255,0,0
chr11	11736830	11736831	GiM-24i(2)	2	+	11736830	11736831	0,192,0
chr11	11737288	11737289	GiM-2i(3)	3	-	11737288	11737289	255,0,0
chr11	11747018	11747019	GiM-19i(3)	3	+	11747018	11747019	0,192,0
chr11	11773156	11773157	GiM-1i(7)	7	-	11773156	11773157	255,0,0
chr11	11773808	11773809	GiM-8i(5)	5	+	11773808	11773809	0,192,0
chr11	11786107	11786108	GiM-19i(3)	3	-	11786107	11786108	255,0,0
chr11	11861890	11861891	GiM-2i(1)	1	+	11861890	11861891	0,192,0
chr11	16906701	16906702	GiM-24i(1)	1	-	16906701	16906702	255,0,0
chr11	19823291	19823292	GiM-25i(6)	6	-	19823291	19823292	255,0,0
chr11	19938497	19938498	GiM-8i(3)	3	-	19938497	19938498	255,0,0
chr11	20534580	20534581	GiM-12i(1)	1	-	20534580	20534581	255,0,0
chr11	20642167	20642168	GiM-4i(7)	7	+	20642167	20642168	0,192,0
chr11	20992474	20992475	GiM-16i(3)	3	+	20992474	20992475	0,192,0
chr11	21075012	21075013	GiM-18i(1)	1	+	21075012	21075013	0,192,0
chr11	21079348	21079349	GiM-15i(12)	12	+	21079348	21079349	0,192,0
chr11	21092628	21092629	GiM-3i(6)	6	-	21092628	21092629	255,0,0
chr11	21120941	21120942	GiM-23i(3)	3	-	21120941	21120942	255,0,0
chr11	22715726	22715727	GiM-12i(8)	8	-	22715726	22715727	255,0,0
chr11	22724863	22724864	GiM-9i(2)	2	+	22724863	22724864	0,192,0
chr11	22744944	22744945	GiM-8i(2)	2	+	22744944	22744945	0,192,0
chr11	22753695	22753696	GiM-26i(1)	1	-	22753695	22753696	255,0,0
chr11	22838965	22838966	GiM-20i(1)	1	+	22838965	22838966	0,192,0
chr11	26289192	26289193	GiM-23i(2)	2	+	26289192	26289193	0,192,0
chr11	26496333	26496334	GiM-3i(5)	5	-	26496333	26496334	255,0,0
chr11	30067449	30067450	GiM-13i(1)	1	+	30067449	30067450	0,192,0
chr11	30081796	30081797	GiM-14i(4)	4	+	30081796	30081797	0,192,0
chr11	30853411	30853412	GiM-6i(1)	1	-	30853411	30853412	255,0,0
chr11	31259036	31259037	GiM-9i(2)	2	+	31259036	31259037	0,192,0
chr11	31647814	31647815	GiM-27i(4)	4	-	31647814	31647815	255,0,0
chr11	31662018	31662019	GiM-11i(1)	1	-	31662018	31662019	255,0,0
chr11	31893264	31893265	GiM-18i(6)	6	-	31893264	31893265	255,0,0
chr11	31898120	31898121	GiM-11i(1)	1	-	31898120	31898121	255,0,0
chr11	32098029	32098030	GiM-23i(1)	1	+	32098029	32098030	0,192,0
chr11	32100643	32100644	GiM-9i(1)	1	+	32100643	32100644	0,192,0
chr11	32249657	32249658	GiM-26i(3)	3	-	32249657	32249658	255,0,0
chr11	32439581	32439582	GiM-7i(2)	2	-	32439581	32439582	255,0,0
chr11	32543834	32543835	GiM-6i(1)	1	-	32543834	32543835	255,0,0
chr11	33840449	33840450	GiM-28i(1)	1	+	33840449	33840450	0,192,0
chr11	33840606	33840607	GiM-9i(7)	7	+	33840606	33840607	0,192,0
chr11	33900031	33900032	GiM-3i(6)	6	+	33900031	33900032	0,192,0
chr11	33909467	33909468	GiM-18i(6)	6	-	33909467	33909468	255,0,0
chr11	33909543	33909544	GiM-17i(3)	3	-	33909543	33909544	255,0,0
chr11	33963452	33963453	GiM-13i(5)	5	+	33963452	33963453	0,192,0
chr11	33965266	33965267	GiM-17i(1)	1	-	33965266	33965267	255,0,0
chr11	33978388	33978389	GiM-27i(1)	1	-	33978388	33978389	255,0,0
chr11	33985735	33985736	GiM-6i(3)	3	-	33985735	33985736	255,0,0
chr11	34584685	34584686	GiM-27i(2)	2	-	34584685	34584686	255,0,0
chr11	34648423	34648424	GiM-14i(4)	4	-	34648423	34648424	255,0,0
chr11	34651440	34651441	GiM-15i(3)	3	-	34651440	34651441	255,0,0
chr11	34651543	34651544	GiM-21i(2)	2	-	34651543	34651544	255,0,0
chr11	34651979	34651980	GiM-11i(7)	7	-	34651979	34651980	255,0,0
chr11	34652172	34652173	GiM-9i(2)	2	+	34652172	34652173	0,192,0
chr11	35139102	35139103	GiM-24i(4)	4	-	35139102	35139103	255,0,0
chr11	35139179	35139180	GiM-22i(4)	4	+	35139179	35139180	0,192,0
chr11	35139708	35139709	GiM-14i(6)	6	-	35139708	35139709	255,0,0
chr11	35145321	35145322	GiM-1i(3)	3	-	35145321	35145322	255,0,0
chr11	43949193	43949194	GiM-3i(4)	4	-	43949193	43949194	255,0,0
chr11	45608743	45608744	GiM-27i(2)	2	+	45608743	45608744	0,192,0
chr11	45609295	45609296	GiM-23i(3)	3	+	45609295	45609296	0,192,0
chr11	45609570	45609571	GiM-3i(2)	2	-	45609570	45609571	255,0,0
chr11	45666086	45666087	GiM-18i(1)	1	-	45666086	45666087	255,0,0
chr11	45871723	45871724	GiM-18i(5)	5	-	45871723	45871724	255,0,0
chr11	45872117	45872118	GiM-2i(2)	2	+	45872117	45872118	0,192,0
chr11	45897825	45897826	GiM-13i(1)	1	+	45897825	45897826	0,192,0
chr11	45899429	45899430	GiM-7i(3)	3	-	45899429	45899430	255,0,0
chr11	45900351	45900352	GiM-13i(6)	6	-	45900351	45900352	255,0,0
chr11	45900467	45900468	GiM-24i(2)	2	-	45900467	45900468	255,0,0
chr11	45902917	45902918	GiM-2i(1)	1	-	45902917	45902918	255,0,0
chr11	45903414	45903415	GiM-13i(2)	2	-	45903414	45903415	255,0,0
chr11	45905243	45905244	GiM-7i(1)	1	+	45905243	45905244	0,192,0
chr11	45939137	45939138	GiM-13i(2)	2	+	45939137	45939138	0,192,0
chr11	46007472	46007473	GiM-16i(1)	1	+	46007472	46007473	0,192,0
chr11	46118248	46118249	GiM-23i(9)	9	+	46118248	46118249	0,192,0
chr11	46119199	46119200	GiM-28i(2)	2	+	46119199	46119200	0,192,0
chr11	46187056	46187057	GiM-16i(1)	1	-	46187056	46187057	255,0,0
chr11	46194745	46194746	GiM-9i(4)	4	+	46194745	46194746	0,192,0
chr11	46196647	46196648	GiM-21i(1)	1	-	46196647	46196648	255,0,0
chr11	46202418	46202419	GiM-6i(2)	2	-	46202418	46202419	255,0,0
chr11	46203361	46203362	GiM-19i(3)	3	-	46203361	46203362	255,0,0
chr11	46203561	46203562	GiM-8i(1)	1	-	46203561	46203562	255,0,0
chr11	46203624	46203625	GiM-14i(3)	3	-	46203624	46203625	255,0,0
chr11	46203752	46203753	GiM-13i(3)	3	+	46203752	46203753	0,192,0
chr11	46205186	46205187	GiM-8i(1)	1	-	46205186	46205187	255,0,0
chr11	46206616	46206617	GiM-7i(1)	1	+	46206616	46206617	0,192,0
chr11	46212392	46212393	GiM-10i(1)	1	+	46212392	46212393	0,192,0
chr11	46234642	46234643	GiM-24i(1)	1	+	46234642	46234643	0,192,0
chr11	46235851	46235852	GiM-23i(2)	2	-	46235851	46235852	255,0,0
chr11	48900450	48900451	GiM-6i(1)	1	+	48900450	48900451	0,192,0
chr11	48902203	48902204	GiM-9i(1)	1	-	48902203	48902204	255,0,0
chr11	48907837	48907838	GiM-10i(2)	2	+	48907837	48907838	0,192,0
chr11	48907846	48907847	GiM-17i(3)	3	+	48907846	48907847	0,192,0
chr11	49008844	49008845	GiM-8i(1)	1	-	49008844	49008845	255,0,0
chr11	49009637	49009638	GiM-8i(5)	5	+	49009637	49009638	0,192,0
chr11	49061844	49061845	GiM-16i(2)	2	+	49061844	49061845	0,192,0
chr11	49062673	49062674	GiM-13i(1)	1	-	49062673	49062674	255,0,0
chr11	49064762	49064763	GiM-5i(2)	2	+	49064762	49064763	0,192,0
chr11	49533605	49533606	GiM-23i(3)	3	-	49533605	49533606	255,0,0
chr11	49534586	49534587	GiM-8i(1)	1	+	49534586	49534587	0,192,0
chr11	49535459	49535460	GiM-16i(10)	10	-	49535459	49535460	255,0,0
chr11	49538063	49538064	GiM-10i(2)	2	+	49538063	49538064	0,192,0
chr11	51420762	51420763	GiM-13i(2)	2	-	51420762	51420763	255,0,0
chr11	51422752	51422753	GiM-25i(3)	3	+	51422752	51422753	0,192,0
chr11	51423048	51423049	GiM-25i(1)	1	-	51423048	51423049	255,0,0
chr11	51428744	51428745	GiM-22i(1)	1	-	51428744	51428745	255,0,0
chr11	51432067	51432068	GiM-11i(1)	1	-	51432067	51432068	255,0,0
chr11	51449936	51449937	GiM-22i(2)	2	+	51449936	51449937	0,192,0
chr11	51450060	51450061	GiM-13i(4)	4	-	51450060	51450061	255,0,0
chr11	51451367	51451368	GiM-25i(6)	6	-	51451367	51451368	255,0,0
chr11	51456892	51456893	GiM-17i(5)	5	+	51456892	51456893	0,192,0
chr11	51457685	51457686	GiM-23i(3)	3	+	51457685	51457686	0,192,0
chr11	51576778	51576779	GiM-17i(1)	1	+	51576778	51576779	0,192,0
chr11	51576778	51576779	GiM-25i(3)	3	+	51576778	51576779	0,192,0
chr11	51761820	51761821	GiM-14i(3)	3	+	51761820	51761821	0,192,0
chr11	51762474	51762475	GiM-8i(1)	1	+	51762474	51762475	0,192,0
chr11	51763042	51763043	GiM-19i(1)	1	+	51763042	51763043	0,192,0
chr11	51763090	51763091	GiM-13i(4)	4	+	51763090	51763091	0,192,0
chr11	51763123	51763124	GiM-14i(1)	1	-	51763123	51763124	255,0,0
chr11	51763831	51763832	GiM-1i(1)	1	+	51763831	51763832	0,192,0
chr11	51763996	51763997	GiM-19i(10)	10	+	51763996	51763997	0,192,0
chr11	51775054	51775055	GiM-16i(3)	3	+	51775054	51775055	0,192,0
chr11	51776020	51776021	GiM-20i(21)	21	-	51776020	51776021	255,0,0
chr11	51781600	51781601	GiM-8i(2)	2	-	51781600	51781601	255,0,0
chr11	51781606	51781607	GiM-24i(3)	3	-	51781606	51781607	255,0,0
chr11	51816983	51816984	GiM-16i(2)	2	-	51816983	51816984	255,0,0
chr11	51911585	51911586	GiM-10i(1)	1	-	51911585	51911586	255,0,0
chr11	52088799	52088800	GiM-25i(2)	2	+	52088799	52088800	0,192,0
chr11	52106810	52106811	GiM-15i(2)	2	-	52106810	52106811	255,0,0
chr11	52107134	52107135	GiM-21i(1)	1	+	52107134	52107135	0,192,0
chr11	52111437	52111438	GiM-9i(2)	2	-	52111437	52111438	255,0,0
chr11	52114205	52114206	GiM-20i(1)	1	-	52114205	52114206	255,0,0
chr11	52116885	52116886	GiM-16i(1)	1	-	52116885	52116886	255,0,0
chr11	52119873	52119874	GiM-26i(1)	1	-	52119873	52119874	255,0,0
chr11	52121028	52121029	GiM-6i(5)	5	-	52121028	52121029	255,0,0
chr11	52122358	52122359	GiM-10i(2)	2	+	52122358	52122359	0,192,0
chr11	52123352	52123353	GiM-7i(29)	29	-	52123352	52123353	255,0,0
chr11	52124771	52124772	GiM-28i(2)	2	-	52124771	52124772	255,0,0
chr11	52125961	52125962	GiM-10i(4)	4	-	52125961	52125962	255,0,0
chr11	52128485	52128486	GiM-24i(3)	3	-	52128485	52128486	255,0,0
chr11	52128507	52128508	GiM-11i(1)	1	-	52128507	52128508	255,0,0
chr11	52128694	52128695	GiM-19i(2)	2	-	52128694	52128695	255,0,0
chr11	52129534	52129535	GiM-8i(5)	5	-	52129534	52129535	255,0,0
chr11	52130268	52130269	GiM-16i(18)	18	-	52130268	52130269	255,0,0
chr11	52130530	52130531	GiM-19i(1)	1	-	52130530	52130531	255,0,0
chr11	52132929	52132930	GiM-20i(4)	4	-	52132929	52132930	255,0,0
chr11	52133833	52133834	GiM-26i(2)	2	+	52133833	52133834	0,192,0
chr11	52133946	52133947	GiM-17i(2)	2	-	52133946	52133947	255,0,0
chr11	52134805	52134806	GiM-16i(1)	1	+	52134805	52134806	0,192,0
chr11	52137099	52137100	GiM-10i(6)	6	-	52137099	52137100	255,0,0
chr11	52150954	52150955	GiM-4i(2)	2	-	52150954	52150955	255,0,0
chr11	52151824	52151825	GiM-5i(1)	1	-	52151824	52151825	255,0,0
chr11	52151954	52151955	GiM-18i(2)	2	+	52151954	52151955	0,192,0
chr11	52152383	52152384	GiM-27i(1)	1	+	52152383	52152384	0,192,0
chr11	52152411	52152412	GiM-22i(3)	3	+	52152411	52152412	0,192,0
chr11	52152417	52152418	GiM-25i(2)	2	+	52152417	52152418	0,192,0
chr11	52152517	52152518	GiM-2i(1)	1	+	52152517	52152518	0,192,0
chr11	52152635	52152636	GiM-9i(1)	1	-	52152635	52152636	255,0,0
chr11	52152690	52152691	GiM-28i(3)	3	+	52152690	52152691	0,192,0
chr11	52153424	52153425	GiM-7i(2)	2	-	52153424	52153425	255,0,0
chr11	52153441	52153442	GiM-2i(2)	2	-	52153441	52153442	255,0,0
chr11	52153550	52153551	GiM-4i(11)	11	+	52153550	52153551	0,192,0
chr11	52153615	52153616	GiM-8i(3)	3	-	52153615	52153616	255,0,0
chr11	52155471	52155472	GiM-11i(1)	1	-	52155471	52155472	255,0,0
chr11	52158059	52158060	GiM-5i(2)	2	-	52158059	52158060	255,0,0
chr11	52942848	52942849	GiM-26i(1)	1	+	52942848	52942849	0,192,0
chr11	52951835	52951836	GiM-7i(3)	3	+	52951835	52951836	0,192,0
chr11	53114532	53114533	GiM-1i(1)	1	-	53114532	53114533	255,0,0
chr11	53114969	53114970	GiM-26i(1)	1	-	53114969	53114970	255,0,0
chr11	53122559	53122560	GiM-5i(4)	4	-	53122559	53122560	255,0,0
chr11	53165297	53165298	GiM-27i(4)	4	-	53165297	53165298	255,0,0
chr11	53331070	53331071	GiM-3i(26)	26	-	53331070	53331071	255,0,0
chr11	53331146	53331147	GiM-5i(2)	2	+	53331146	53331147	0,192,0
chr11	53521333	53521334	GiM-13i(6)	6	-	53521333	53521334	255,0,0
chr11	53561249	53561250	GiM-27i(5)	5	+	53561249	53561250	0,192,0
chr11	53569311	53569312	GiM-16i(1)	1	-	53569311	53569312	255,0,0
chr11	53569705	53569706	GiM-27i(1)	1	+	53569705	53569706	0,192,0
chr11	53609600	53609601	GiM-22i(1)	1	+	53609600	53609601	0,192,0
chr11	53634863	53634864	GiM-1i(1)	1	+	53634863	53634864	0,192,0
chr11	53651733	53651734	GiM-10i(1)	1	-	53651733	53651734	255,0,0
chr11	53653363	53653364	GiM-1i(1)	1	+	53653363	53653364	0,192,0
chr11	53653654	53653655	GiM-13i(1)	1	-	53653654	53653655	255,0,0
chr11	53655549	53655550	GiM-16i(2)	2	-	53655549	53655550	255,0,0
chr11	53658584	53658585	GiM-2i(1)	1	-	53658584	53658585	255,0,0
chr11	53664063	53664064	GiM-2i(1)	1	+	53664063	53664064	0,192,0
chr11	53665283	53665284	GiM-11i(4)	4	-	53665283	53665284	255,0,0
chr11	53707316	53707317	GiM-22i(2)	2	-	53707316	53707317	255,0,0
chr11	53872566	53872567	GiM-7i(2)	2	+	53872566	53872567	0,192,0
chr11	53876144	53876145	GiM-26i(10)	10	+	53876144	53876145	0,192,0
chr11	53877061	53877062	GiM-3i(2)	2	+	53877061	53877062	0,192,0
chr11	53877888	53877889	GiM-24i(1)	1	+	53877888	53877889	0,192,0
chr11	53878421	53878422	GiM-3i(1)	1	-	53878421	53878422	255,0,0
chr11	53879949	53879950	GiM-25i(2)	2	-	53879949	53879950	255,0,0
chr11	53880112	53880113	GiM-13i(2)	2	+	53880112	53880113	0,192,0
chr11	53880615	53880616	GiM-9i(3)	3	+	53880615	53880616	0,192,0
chr11	53881149	53881150	GiM-6i(1)	1	+	53881149	53881150	0,192,0
chr11	54038575	54038576	GiM-17i(3)	3	-	54038575	54038576	255,0,0
chr11	54344924	54344925	GiM-6i(1)	1	+	54344924	54344925	0,192,0
chr11	54429119	54429120	GiM-24i(1)	1	+	54429119	54429120	0,192,0
chr11	54589575	54589576	GiM-21i(1)	1	+	54589575	54589576	0,192,0
chr11	54660511	54660512	GiM-2i(1)	1	-	54660511	54660512	255,0,0
chr11	54664437	54664438	GiM-10i(1)	1	-	54664437	54664438	255,0,0
chr11	54664558	54664559	GiM-24i(1)	1	-	54664558	54664559	255,0,0
chr11	54674732	54674733	GiM-13i(6)	6	-	54674732	54674733	255,0,0
chr11	54772793	54772794	GiM-12i(6)	6	-	54772793	54772794	255,0,0
chr11	54837370	54837371	GiM-14i(2)	2	+	54837370	54837371	0,192,0
chr11	54885632	54885633	GiM-1i(1)	1	+	54885632	54885633	0,192,0
chr11	54886328	54886329	GiM-13i(3)	3	-	54886328	54886329	255,0,0
chr11	54933292	54933293	GiM-22i(1)	1	+	54933292	54933293	0,192,0
chr11	55034899	55034900	GiM-6i(4)	4	+	55034899	55034900	0,192,0
chr11	57479017	57479018	GiM-3i(1)	1	-	57479017	57479018	255,0,0
chr11	57479439	57479440	GiM-25i(1)	1	-	57479439	57479440	255,0,0
chr11	57914221	57914222	GiM-11i(5)	5	+	57914221	57914222	0,192,0
chr11	57915031	57915032	GiM-9i(2)	2	+	57915031	57915032	0,192,0
chr11	57952724	57952725	GiM-10i(1)	1	-	57952724	57952725	255,0,0
chr11	57985625	57985626	GiM-3i(2)	2	-	57985625	57985626	255,0,0
chr11	58014681	58014682	GiM-25i(5)	5	+	58014681	58014682	0,192,0
chr11	58028114	58028115	GiM-14i(5)	5	+	58028114	58028115	0,192,0
chr11	58246972	58246973	GiM-3i(3)	3	-	58246972	58246973	255,0,0
chr11	58632667	58632668	GiM-14i(2)	2	-	58632667	58632668	255,0,0
chr11	58642892	58642893	GiM-2i(1)	1	-	58642892	58642893	255,0,0
chr11	58645160	58645161	GiM-20i(4)	4	+	58645160	58645161	0,192,0
chr11	58750812	58750813	GiM-2i(2)	2	-	58750812	58750813	255,0,0
chr11	58760058	58760059	GiM-21i(7)	7	+	58760058	58760059	0,192,0
chr11	58763221	58763222	GiM-9i(1)	1	+	58763221	58763222	0,192,0
chr11	59201559	59201560	GiM-28i(1)	1	+	59201559	59201560	0,192,0
chr11	59212950	59212951	GiM-21i(2)	2	+	59212950	59212951	0,192,0
chr11	59375405	59375406	GiM-19i(1)	1	-	59375405	59375406	255,0,0
chr11	59375483	59375484	GiM-16i(2)	2	+	59375483	59375484	0,192,0
chr11	59441733	59441734	GiM-21i(3)	3	-	59441733	59441734	255,0,0
chr11	59450387	59450388	GiM-4i(2)	2	-	59450387	59450388	255,0,0
chr11	59927774	59927775	GiM-11i(3)	3	+	59927774	59927775	0,192,0
chr11	59928033	59928034	GiM-27i(3)	3	-	59928033	59928034	255,0,0
chr11	59928307	59928308	GiM-25i(1)	1	-	59928307	59928308	255,0,0
chr11	59975893	59975894	GiM-20i(3)	3	+	59975893	59975894	0,192,0
chr11	59975893	59975894	GiM-2i(1)	1	+	59975893	59975894	0,192,0
chr11	60042359	60042360	GiM-27i(2)	2	+	60042359	60042360	0,192,0
chr11	60045422	60045423	GiM-12i(3)	3	+	60045422	60045423	0,192,0
chr11	60046182	60046183	GiM-2i(2)	2	+	60046182	60046183	0,192,0
chr11	60060831	60060832	GiM-12i(3)	3	-	60060831	60060832	255,0,0
chr11	60540299	60540300	GiM-23i(3)	3	-	60540299	60540300	255,0,0
chr11	60591283	60591284	GiM-15i(2)	2	-	60591283	60591284	255,0,0
chr11	60914305	60914306	GiM-22i(4)	4	+	60914305	60914306	0,192,0
chr11	61460809	61460810	GiM-12i(1)	1	-	61460809	61460810	255,0,0
chr11	61466163	61466164	GiM-13i(1)	1	-	61466163	61466164	255,0,0
chr11	61675246	61675247	GiM-12i(4)	4	-	61675246	61675247	255,0,0
chr11	61742676	61742677	GiM-28i(1)	1	+	61742676	61742677	0,192,0
chr11	62351906	62351907	GiM-2i(5)	5	-	62351906	62351907	255,0,0
chr11	62362923	62362924	GiM-11i(9)	9	-	62362923	62362924	255,0,0
chr11	62363393	62363394	GiM-21i(2)	2	+	62363393	62363394	0,192,0
chr11	62389773	62389774	GiM-13i(4)	4	+	62389773	62389774	0,192,0
chr11	62389917	62389918	GiM-28i(3)	3	+	62389917	62389918	0,192,0
chr11	62391273	62391274	GiM-21i(2)	2	+	62391273	62391274	0,192,0
chr11	62572117	62572118	GiM-20i(1)	1	+	62572117	62572118	0,192,0
chr11	62602673	62602674	GiM-16i(1)	1	-	62602673	62602674	255,0,0
chr11	62858947	62858948	GiM-15i(2)	2	-	62858947	62858948	255,0,0
chr11	63034895	63034896	GiM-17i(2)	2	+	63034895	63034896	0,192,0
chr11	63165850	63165851	GiM-28i(1)	1	-	63165850	63165851	255,0,0
chr11	63166222	63166223	GiM-19i(1)	1	+	63166222	63166223	0,192,0
chr11	63166283	63166284	GiM-5i(2)	2	-	63166283	63166284	255,0,0
chr11	63167664	63167665	GiM-7i(1)	1	+	63167664	63167665	0,192,0
chr11	63872640	63872641	GiM-27i(3)	3	+	63872640	63872641	0,192,0
chr11	63873741	63873742	GiM-20i(5)	5	-	63873741	63873742	255,0,0
chr11	64574808	64574809	GiM-15i(1)	1	+	64574808	64574809	0,192,0
chr11	67831313	67831314	GiM-26i(1)	1	-	67831313	67831314	255,0,0
chr11	68013856	68013857	GiM-22i(2)	2	-	68013856	68013857	255,0,0
chr11	68014278	68014279	GiM-9i(2)	2	-	68014278	68014279	255,0,0
chr11	68081775	68081776	GiM-19i(2)	2	-	68081775	68081776	255,0,0
chr11	68083725	68083726	GiM-11i(3)	3	-	68083725	68083726	255,0,0
chr11	68231443	68231444	GiM-4i(2)	2	+	68231443	68231444	0,192,0
chr11	68232054	68232055	GiM-13i(8)	8	+	68232054	68232055	0,192,0
chr11	68237188	68237189	GiM-4i(3)	3	+	68237188	68237189	0,192,0
chr11	68238940	68238941	GiM-3i(1)	1	+	68238940	68238941	0,192,0
chr11	68238953	68238954	GiM-19i(1)	1	+	68238953	68238954	0,192,0
chr11	68238966	68238967	GiM-16i(4)	4	+	68238966	68238967	0,192,0
chr11	68239456	68239457	GiM-5i(1)	1	+	68239456	68239457	0,192,0
chr11	68239458	68239459	GiM-10i(1)	1	+	68239458	68239459	0,192,0
chr11	68239466	68239467	GiM-9i(1)	1	+	68239466	68239467	0,192,0
chr11	68239502	68239503	GiM-2i(2)	2	+	68239502	68239503	0,192,0
chr11	68239888	68239889	GiM-3i(1)	1	+	68239888	68239889	0,192,0
chr11	68240027	68240028	GiM-27i(1)	1	+	68240027	68240028	0,192,0
chr11	68240040	68240041	GiM-4i(3)	3	+	68240040	68240041	0,192,0
chr11	68240122	68240123	GiM-19i(4)	4	+	68240122	68240123	0,192,0
chr11	68240366	68240367	GiM-14i(7)	7	+	68240366	68240367	0,192,0
chr11	68240464	68240465	GiM-9i(1)	1	+	68240464	68240465	0,192,0
chr11	68240483	68240484	GiM-15i(1)	1	+	68240483	68240484	0,192,0
chr11	68240527	68240528	GiM-1i(1)	1	+	68240527	68240528	0,192,0
chr11	68241574	68241575	GiM-14i(10)	10	+	68241574	68241575	0,192,0
chr11	68241588	68241589	GiM-5i(32)	32	+	68241588	68241589	0,192,0
chr11	68241604	68241605	GiM-8i(3)	3	+	68241604	68241605	0,192,0
chr11	68241611	68241612	GiM-22i(8)	8	+	68241611	68241612	0,192,0
chr11	68241611	68241612	GiM-28i(1)	1	+	68241611	68241612	0,192,0
chr11	68241693	68241694	GiM-5i(7)	7	-	68241693	68241694	255,0,0
chr11	68241801	68241802	GiM-27i(1)	1	+	68241801	68241802	0,192,0
chr11	68241840	68241841	GiM-14i(2)	2	-	68241840	68241841	255,0,0
chr11	68242173	68242174	GiM-9i(2)	2	+	68242173	68242174	0,192,0
chr11	68242201	68242202	GiM-10i(4)	4	+	68242201	68242202	0,192,0
chr11	68242342	68242343	GiM-25i(3)	3	+	68242342	68242343	0,192,0
chr11	68242620	68242621	GiM-1i(5)	5	+	68242620	68242621	0,192,0
chr11	68242629	68242630	GiM-24i(1)	1	+	68242629	68242630	0,192,0
chr11	68242646	68242647	GiM-4i(2)	2	+	68242646	68242647	0,192,0
chr11	68242660	68242661	GiM-14i(2)	2	+	68242660	68242661	0,192,0
chr11	68243577	68243578	GiM-21i(1)	1	+	68243577	68243578	0,192,0
chr11	68243627	68243628	GiM-8i(1)	1	+	68243627	68243628	0,192,0
chr11	68243649	68243650	GiM-14i(1)	1	+	68243649	68243650	0,192,0
chr11	68243662	68243663	GiM-1i(9)	9	+	68243662	68243663	0,192,0
chr11	68243726	68243727	GiM-6i(4)	4	+	68243726	68243727	0,192,0
chr11	68243727	68243728	GiM-1i(2)	2	+	68243727	68243728	0,192,0
chr11	68243762	68243763	GiM-3i(5)	5	+	68243762	68243763	0,192,0
chr11	68243894	68243895	GiM-16i(2)	2	-	68243894	68243895	255,0,0
chr11	68244001	68244002	GiM-14i(4)	4	+	68244001	68244002	0,192,0
chr11	68244594	68244595	GiM-4i(5)	5	+	68244594	68244595	0,192,0
chr11	68244605	68244606	GiM-21i(3)	3	+	68244605	68244606	0,192,0
chr11	68244735	68244736	GiM-3i(14)	14	+	68244735	68244736	0,192,0
chr11	68244740	68244741	GiM-14i(2)	2	+	68244740	68244741	0,192,0
chr11	68244744	68244745	GiM-15i(23)	23	+	68244744	68244745	0,192,0
chr11	68244769	68244770	GiM-2i(1)	1	+	68244769	68244770	0,192,0
chr11	68244773	68244774	GiM-21i(2)	2	+	68244773	68244774	0,192,0
chr11	68244775	68244776	GiM-11i(4)	4	+	68244775	68244776	0,192,0
chr11	68244776	68244777	GiM-24i(1)	1	+	68244776	68244777	0,192,0
chr11	68244907	68244908	GiM-1i(3)	3	+	68244907	68244908	0,192,0
chr11	68244911	68244912	GiM-21i(2)	2	-	68244911	68244912	255,0,0
chr11	68244936	68244937	GiM-3i(30)	30	+	68244936	68244937	0,192,0
chr11	68244981	68244982	GiM-28i(4)	4	+	68244981	68244982	0,192,0
chr11	68244998	68244999	GiM-19i(3)	3	+	68244998	68244999	0,192,0
chr11	68245016	68245017	GiM-14i(6)	6	+	68245016	68245017	0,192,0
chr11	68245020	68245021	GiM-1i(11)	11	+	68245020	68245021	0,192,0
chr11	68245022	68245023	GiM-10i(4)	4	+	68245022	68245023	0,192,0
chr11	68245022	68245023	GiM-2i(5)	5	+	68245022	68245023	0,192,0
chr11	68245022	68245023	GiM-5i(2)	2	+	68245022	68245023	0,192,0
chr11	68245023	68245024	GiM-23i(4)	4	+	68245023	68245024	0,192,0
chr11	68245085	68245086	GiM-7i(2)	2	+	68245085	68245086	0,192,0
chr11	68245087	68245088	GiM-17i(7)	7	+	68245087	68245088	0,192,0
chr11	68245087	68245088	GiM-2i(3)	3	+	68245087	68245088	0,192,0
chr11	68245087	68245088	GiM-4i(2)	2	+	68245087	68245088	0,192,0
chr11	68245091	68245092	GiM-1i(7)	7	+	68245091	68245092	0,192,0
chr11	68245092	68245093	GiM-14i(3)	3	+	68245092	68245093	0,192,0
chr11	68245105	68245106	GiM-11i(3)	3	+	68245105	68245106	0,192,0
chr11	68245133	68245134	GiM-2i(1)	1	-	68245133	68245134	255,0,0
chr11	68245140	68245141	GiM-16i(10)	10	-	68245140	68245141	255,0,0
chr11	68245164	68245165	GiM-15i(83)	83	+	68245164	68245165	0,192,0
chr11	68245216	68245217	GiM-14i(2)	2	+	68245216	68245217	0,192,0
chr11	68249700	68249701	GiM-9i(14)	14	+	68249700	68249701	0,192,0
chr11	68263495	68263496	GiM-16i(14)	14	+	68263495	68263496	0,192,0
chr11	68264305	68264306	GiM-2i(6)	6	+	68264305	68264306	0,192,0
chr11	68265287	68265288	GiM-8i(1)	1	+	68265287	68265288	0,192,0
chr11	68266610	68266611	GiM-20i(3)	3	+	68266610	68266611	0,192,0
chr11	68272962	68272963	GiM-14i(1)	1	+	68272962	68272963	0,192,0
chr11	68278027	68278028	GiM-21i(1)	1	+	68278027	68278028	0,192,0
chr11	68583003	68583004	GiM-26i(2)	2	+	68583003	68583004	0,192,0
chr11	68603840	68603841	GiM-20i(2)	2	-	68603840	68603841	255,0,0
chr11	68767511	68767512	GiM-22i(9)	9	+	68767511	68767512	0,192,0
chr11	68820775	68820776	GiM-4i(4)	4	+	68820775	68820776	0,192,0
chr11	68826347	68826348	GiM-22i(1)	1	+	68826347	68826348	0,192,0
chr11	68855008	68855009	GiM-16i(1)	1	+	68855008	68855009	0,192,0
chr11	69046162	69046163	GiM-28i(2)	2	+	69046162	69046163	0,192,0
chr11	69089812	69089813	GiM-9i(2)	2	-	69089812	69089813	255,0,0
chr11	69225614	69225615	GiM-17i(3)	3	+	69225614	69225615	0,192,0
chr11	69226182	69226183	GiM-9i(3)	3	+	69226182	69226183	0,192,0
chr11	69230922	69230923	GiM-21i(8)	8	+	69230922	69230923	0,192,0
chr11	69231786	69231787	GiM-5i(1)	1	-	69231786	69231787	255,0,0
chr11	69234060	69234061	GiM-27i(4)	4	+	69234060	69234061	0,192,0
chr11	69394439	69394440	GiM-21i(3)	3	+	69394439	69394440	0,192,0
chr11	69395338	69395339	GiM-12i(2)	2	+	69395338	69395339	0,192,0
chr11	69736423	69736424	GiM-25i(2)	2	+	69736423	69736424	0,192,0
chr11	69809937	69809938	GiM-20i(17)	17	+	69809937	69809938	0,192,0
chr11	70079021	70079022	GiM-8i(1)	1	+	70079021	70079022	0,192,0
chr11	70111307	70111308	GiM-17i(7)	7	+	70111307	70111308	0,192,0
chr11	70189690	70189691	GiM-22i(3)	3	+	70189690	70189691	0,192,0
chr11	70223818	70223819	GiM-5i(1)	1	-	70223818	70223819	255,0,0
chr11	70285938	70285939	GiM-3i(5)	5	+	70285938	70285939	0,192,0
chr11	70301027	70301028	GiM-12i(5)	5	-	70301027	70301028	255,0,0
chr11	70307740	70307741	GiM-9i(1)	1	-	70307740	70307741	255,0,0
chr11	70321083	70321084	GiM-8i(1)	1	-	70321083	70321084	255,0,0
chr11	70321886	70321887	GiM-10i(1)	1	-	70321886	70321887	255,0,0
chr11	70378075	70378076	GiM-16i(1)	1	-	70378075	70378076	255,0,0
chr11	70469035	70469036	GiM-12i(1)	1	-	70469035	70469036	255,0,0
chr11	70472189	70472190	GiM-3i(3)	3	-	70472189	70472190	255,0,0
chr11	70481877	70481878	GiM-8i(1)	1	-	70481877	70481878	255,0,0
chr11	70578741	70578742	GiM-4i(10)	10	-	70578741	70578742	255,0,0
chr11	70578932	70578933	GiM-10i(2)	2	-	70578932	70578933	255,0,0
chr11	70579368	70579369	GiM-20i(4)	4	+	70579368	70579369	0,192,0
chr11	70605375	70605376	GiM-22i(1)	1	-	70605375	70605376	255,0,0
chr11	71483575	71483576	GiM-16i(1)	1	-	71483575	71483576	255,0,0
chr11	72764134	72764135	GiM-6i(1)	1	-	72764134	72764135	255,0,0
chr11	72766535	72766536	GiM-11i(1)	1	+	72766535	72766536	0,192,0
chr11	72823344	72823345	GiM-12i(8)	8	+	72823344	72823345	0,192,0
chr11	72823848	72823849	GiM-22i(2)	2	-	72823848	72823849	255,0,0
chr11	72907352	72907353	GiM-19i(2)	2	-	72907352	72907353	255,0,0
chr11	72907508	72907509	GiM-7i(1)	1	+	72907508	72907509	0,192,0
chr11	72908481	72908482	GiM-13i(6)	6	+	72908481	72908482	0,192,0
chr11	72908729	72908730	GiM-5i(12)	12	-	72908729	72908730	255,0,0
chr11	72908892	72908893	GiM-4i(1)	1	-	72908892	72908893	255,0,0
chr11	72921364	72921365	GiM-10i(1)	1	-	72921364	72921365	255,0,0
chr11	72922349	72922350	GiM-28i(6)	6	+	72922349	72922350	0,192,0
chr11	72922762	72922763	GiM-17i(1)	1	-	72922762	72922763	255,0,0
chr11	73919453	73919454	GiM-27i(2)	2	-	73919453	73919454	255,0,0
chr11	74330221	74330222	GiM-17i(13)	13	+	74330221	74330222	0,192,0
chr11	74330627	74330628	GiM-3i(7)	7	+	74330627	74330628	0,192,0
chr11	74331260	74331261	GiM-24i(2)	2	+	74331260	74331261	0,192,0
chr11	74333980	74333981	GiM-5i(2)	2	+	74333980	74333981	0,192,0
chr11	74583185	74583186	GiM-6i(4)	4	+	74583185	74583186	0,192,0
chr11	74583186	74583187	GiM-28i(4)	4	+	74583186	74583187	0,192,0
chr11	74583191	74583192	GiM-19i(4)	4	+	74583191	74583192	0,192,0
chr11	74583196	74583197	GiM-14i(3)	3	+	74583196	74583197	0,192,0
chr11	74583208	74583209	GiM-7i(9)	9	+	74583208	74583209	0,192,0
chr11	74583209	74583210	GiM-26i(12)	12	+	74583209	74583210	0,192,0
chr11	74583211	74583212	GiM-25i(2)	2	+	74583211	74583212	0,192,0
chr11	74583234	74583235	GiM-10i(1)	1	+	74583234	74583235	0,192,0
chr11	74645446	74645447	GiM-15i(4)	4	+	74645446	74645447	0,192,0
chr11	74652832	74652833	GiM-9i(5)	5	+	74652832	74652833	0,192,0
chr11	74711824	74711825	GiM-5i(2)	2	+	74711824	74711825	0,192,0
chr11	74827287	74827288	GiM-20i(3)	3	+	74827287	74827288	0,192,0
chr11	75023260	75023261	GiM-2i(1)	1	-	75023260	75023261	255,0,0
chr11	75025299	75025300	GiM-3i(1)	1	+	75025299	75025300	0,192,0
chr11	75092304	75092305	GiM-15i(2)	2	-	75092304	75092305	255,0,0
chr11	75092355	75092356	GiM-2i(1)	1	+	75092355	75092356	0,192,0
chr11	75093002	75093003	GiM-8i(1)	1	-	75093002	75093003	255,0,0
chr11	75094696	75094697	GiM-18i(2)	2	-	75094696	75094697	255,0,0
chr11	75095349	75095350	GiM-3i(11)	11	-	75095349	75095350	255,0,0
chr11	75268443	75268444	GiM-4i(4)	4	+	75268443	75268444	0,192,0
chr11	75273609	75273610	GiM-20i(3)	3	-	75273609	75273610	255,0,0
chr11	75273957	75273958	GiM-26i(7)	7	-	75273957	75273958	255,0,0
chr11	75274272	75274273	GiM-8i(2)	2	+	75274272	75274273	0,192,0
chr11	75346261	75346262	GiM-21i(1)	1	+	75346261	75346262	0,192,0
chr11	75347723	75347724	GiM-8i(1)	1	-	75347723	75347724	255,0,0
chr11	75349521	75349522	GiM-9i(5)	5	+	75349521	75349522	0,192,0
chr11	75349565	75349566	GiM-2i(5)	5	-	75349565	75349566	255,0,0
chr11	75349853	75349854	GiM-13i(2)	2	-	75349853	75349854	255,0,0
chr11	75349854	75349855	GiM-26i(2)	2	-	75349854	75349855	255,0,0
chr11	75350140	75350141	GiM-10i(3)	3	-	75350140	75350141	255,0,0
chr11	75351121	75351122	GiM-1i(1)	1	+	75351121	75351122	0,192,0
chr11	75352168	75352169	GiM-11i(1)	1	-	75352168	75352169	255,0,0
chr11	75352781	75352782	GiM-8i(2)	2	+	75352781	75352782	0,192,0
chr11	75352862	75352863	GiM-27i(2)	2	+	75352862	75352863	0,192,0
chr11	75352884	75352885	GiM-26i(1)	1	-	75352884	75352885	255,0,0
chr11	75354172	75354173	GiM-3i(6)	6	+	75354172	75354173	0,192,0
chr11	75354184	75354185	GiM-27i(5)	5	+	75354184	75354185	0,192,0
chr11	75374425	75374426	GiM-24i(1)	1	+	75374425	75374426	0,192,0
chr11	75375104	75375105	GiM-18i(4)	4	+	75375104	75375105	0,192,0
chr11	75378453	75378454	GiM-16i(1)	1	-	75378453	75378454	255,0,0
chr11	75459388	75459389	GiM-21i(2)	2	+	75459388	75459389	0,192,0
chr11	75465222	75465223	GiM-5i(2)	2	-	75465222	75465223	255,0,0
chr11	75467306	75467307	GiM-7i(10)	10	-	75467306	75467307	255,0,0
chr11	75467321	75467322	GiM-23i(1)	1	-	75467321	75467322	255,0,0
chr11	75546054	75546055	GiM-19i(2)	2	+	75546054	75546055	0,192,0
chr11	75546969	75546970	GiM-19i(3)	3	-	75546969	75546970	255,0,0
chr11	75640802	75640803	GiM-14i(1)	1	+	75640802	75640803	0,192,0
chr11	75700606	75700607	GiM-5i(2)	2	+	75700606	75700607	0,192,0
chr11	75791214	75791215	GiM-19i(1)	1	+	75791214	75791215	0,192,0
chr11	75791296	75791297	GiM-24i(4)	4	-	75791296	75791297	255,0,0
chr11	75897395	75897396	GiM-18i(1)	1	-	75897395	75897396	255,0,0
chr11	75897879	75897880	GiM-18i(1)	1	-	75897879	75897880	255,0,0
chr11	75898994	75898995	GiM-15i(3)	3	+	75898994	75898995	0,192,0
chr11	76309508	76309509	GiM-10i(1)	1	+	76309508	76309509	0,192,0
chr11	76576283	76576284	GiM-22i(4)	4	+	76576283	76576284	0,192,0
chr11	76597496	76597497	GiM-6i(1)	1	-	76597496	76597497	255,0,0
chr11	76703797	76703798	GiM-16i(1)	1	-	76703797	76703798	255,0,0
chr11	76760842	76760843	GiM-13i(1)	1	+	76760842	76760843	0,192,0
chr11	76967091	76967092	GiM-10i(1)	1	-	76967091	76967092	255,0,0
chr11	77304452	77304453	GiM-10i(3)	3	-	77304452	77304453	255,0,0
chr11	77305565	77305566	GiM-27i(1)	1	+	77305565	77305566	0,192,0
chr11	77305571	77305572	GiM-21i(6)	6	-	77305571	77305572	255,0,0
chr11	77306215	77306216	GiM-12i(3)	3	-	77306215	77306216	255,0,0
chr11	77332973	77332974	GiM-28i(1)	1	-	77332973	77332974	255,0,0
chr11	77333032	77333033	GiM-28i(2)	2	-	77333032	77333033	255,0,0
chr11	77333236	77333237	GiM-2i(1)	1	-	77333236	77333237	255,0,0
chr11	77333418	77333419	GiM-13i(1)	1	+	77333418	77333419	0,192,0
chr11	77333557	77333558	GiM-14i(5)	5	-	77333557	77333558	255,0,0
chr11	77333847	77333848	GiM-9i(1)	1	-	77333847	77333848	255,0,0
chr11	77499070	77499071	GiM-22i(2)	2	+	77499070	77499071	0,192,0
chr11	77603477	77603478	GiM-10i(6)	6	+	77603477	77603478	0,192,0
chr11	77603521	77603522	GiM-9i(1)	1	+	77603521	77603522	0,192,0
chr11	77603848	77603849	GiM-5i(2)	2	+	77603848	77603849	0,192,0
chr11	77603968	77603969	GiM-20i(1)	1	-	77603968	77603969	255,0,0
chr11	77605846	77605847	GiM-3i(3)	3	-	77605846	77605847	255,0,0
chr11	77699958	77699959	GiM-11i(1)	1	+	77699958	77699959	0,192,0
[truncated: 11,455 more rows]
